# Supplementary material for: Characterization of Yeast Extracellular Vesicles: Evidence for the Participation of Different Pathways of Cellular Traffic in Vesicle Biogenesis
Source: PLoS One. 2010 Jun 14;5(6):e11113. doi: 10.1371/journal.pone.0011113 (PMC2885426; doi:10.1371/journal.pone.0011113)
Supplement: Table S3 — All identified proteins. (0.18 MB XLS) [file pone.0011113.s003.xls]

## Sheet: Plan1
Protein group	Protein number	Accession number/descripition	Total number of peptide	Total number of spectra	Xcorr sum	Peptide probability
1	1	YLR044C PDC1 SGDID:S000004034_ Chr XII from 234082-232391_ reverse complement_ Verified ORF_ "Major of three pyruvate decarboxylase isozymes_ key enzyme in alcoholic fermentation_ decarboxylates pyruvate to acetaldehyde; subject to glucose-_ ethanol-_ and autoregulation; involved in amino acid catabolism"	34	963	159.416	3.31e-08
2	1	YFR053C HXK1 SGDID:S000001949_ Chr VI from 255036-253579_ reverse complement_ Verified ORF_ "Hexokinase isoenzyme 1_ a cytosolic protein that catalyzes phosphorylation of glucose during glucose metabolism; expression is highest during growth on non-glucose carbon sources; glucose-induced repression involves the hexokinase Hxk2p"	33	262	134.125	1.27e-11
3	1	YER091C MET6 SGDID:S000000893_ Chr V from 342163-339860_ reverse complement_ Verified ORF_ "Cobalamin-independent methionine synthase_ involved in amino acid biosynthesis; requires a minimum of two glutamates on the methyltetrahydrofolate substrate_ similar to bacterial metE homologs"	29	142	106.51	2.81e-07
4	1	YHR174W ENO2 SGDID:S000001217_ Chr VIII from 451327-452640_ Verified ORF_ "Enolase II_ a phosphopyruvate hydratase that catalyzes the conversion of 2-phosphoglycerate to phosphoenolpyruvate during glycolysis and the reverse reaction during gluconeogenesis; expression is induced in response to glucose"	29	1514	138.389	2.36e-10
5	1	YGL253W HXK2 SGDID:S000003222_ Chr VII from 23935-25395_ Verified ORF_ "Hexokinase isoenzyme 2 that catalyzes phosphorylation of glucose in the cytosol; predominant hexokinase during growth on glucose; functions in the nucleus to repress expression of HXK1 and GLK1 and to induce expression of its own gene"	28	319	108.481	1.98e-08
6	1	YLL024C SSA2 SGDID:S000003947_ Chr XII from 97484-95565_ reverse complement_ Verified ORF_ "ATP binding protein involved in protein folding and vacuolar import of proteins; member of heat shock protein 70 (HSP70) family; associated with the chaperonin-containing T-complex; present in the cytoplasm_ vacuolar membrane and cell wall"	27	291	97.312	1
7	1	YAL005C SSA1 SGDID:S000000004_ Chr I from 141433-139505_ reverse complement_ Verified ORF_ "ATPase involved in protein folding and nuclear localization signal (NLS)-directed nuclear transport; member of heat shock protein 70 (HSP70) family; forms a chaperone complex with Ydj1p; localized to the nucleus_ cytoplasm_ and cell wall"	27	321	103.095	7.7e-07
8	1	YGR254W ENO1 SGDID:S000003486_ Chr VII from 1000932-1002245_ Verified ORF_ "Enolase I_ a phosphopyruvate hydratase that catalyzes the conversion of 2-phosphoglycerate to phosphoenolpyruvate during glycolysis and the reverse reaction during gluconeogenesis; expression is repressed in response to glucose"	25	1387	120.462	2.22e-15
9	1	YLR300W EXG1 SGDID:S000004291_ Chr XII from 728957-730303_ Verified ORF_ "Major exo-1_3-beta-glucanase of the cell wall_ involved in cell wall beta-glucan assembly; exists as three differentially glycosylated isoenzymes"	23	989	101.531	1.11e-15
10	1	YCR012W PGK1 SGDID:S000000605_ Chr III from 137744-138994_ Verified ORF_ "3-phosphoglycerate kinase_ catalyzes transfer of high-energy phosphoryl groups from the acyl phosphate of 1_3-bisphosphoglycerate to ADP to produce ATP; key enzyme in glycolysis and gluconeogenesis"	22	472	96.555	7.8e-13
11	1	YMR186W HSC82 SGDID:S000004798_ Chr XIII from 632354-634471_ Verified ORF_ "Cytoplasmic chaperone of the Hsp90 family_ redundant in function and nearly identical with Hsp82p_ and together they are essential; expressed constitutively at 10-fold higher basal levels than HSP82 and induced 2-3 fold by heat shock"	22	213	82.152	7.99e-08
12	1	YJR009C TDH2 SGDID:S000003769_ Chr X from 454674-453676_ reverse complement_ Verified ORF_ "Glyceraldehyde-3-phosphate dehydrogenase_ isozyme 2_ involved in glycolysis and gluconeogenesis; tetramer that catalyzes the reaction of glyceraldehyde-3-phosphate to 1_3 bis-phosphoglycerate; detected in the cytoplasm and cell-wall"	22	1246	108.403	4.21e-11
13	1	YPL053C KTR6 SGDID:S000005974_ Chr XVI from 458455-457115_ reverse complement_ Verified ORF_ "Probable mannosylphosphate transferase involved in the synthesis of core oligosaccharides in protein glycosylation pathway; member of the KRE2/MNT1 mannosyltransferase family"	21	239	90.602	7.18e-11
14	1	YGR192C TDH3 SGDID:S000003424_ Chr VII from 883815-882817_ reverse complement_ Verified ORF_ "Glyceraldehyde-3-phosphate dehydrogenase_ isozyme 3_ involved in glycolysis and gluconeogenesis; tetramer that catalyzes the reaction of glyceraldehyde-3-phosphate to 1_3 bis-phosphoglycerate; detected in the cytoplasm and cell-wall"	21	1714	107.872	2e-14
15	1	YAL038W CDC19 SGDID:S000000036_ Chr I from 71787-73289_ Verified ORF_ "Pyruvate kinase_ functions as a homotetramer in glycolysis to convert phosphoenolpyruvate to pyruvate_ the input for aerobic (TCA cycle) or anaerobic (glucose fermentation) respiration"	21	285	80.16	3.42e-10
16	1	YGL234W ADE5_7 SGDID:S000003203_ Chr VII from 56482-58890_ Verified ORF_ "Bifunctional enzyme of the 'de novo' purine nucleotide biosynthetic pathway_ contains aminoimidazole ribotide synthetase and glycinamide ribotide synthetase activities"	21	53	68.158	0.000151
17	1	YBR196C PGI1 SGDID:S000000400_ Chr II from 613895-612231_ reverse complement_ Verified ORF_ "Glycolytic enzyme phosphoglucose isomerase_ catalyzes the interconversion of glucose-6-phosphate and fructose-6-phosphate; required for cell cycle progression and completion of the gluconeogenic events of sporulation"	21	337	93.771	2.46e-10
18	1	YHR183W GND1 SGDID:S000001226_ Chr VIII from 470960-472429_ Verified ORF_ "6-phosphogluconate dehydrogenase (decarboxylating)_ catalyzes an NADPH regenerating reaction in the pentose phosphate pathway; required for growth on D-glucono-delta-lactone and adaptation to oxidative stress"	20	178	78.197	6.93e-06
19	1	YJL052W TDH1 SGDID:S000003588_ Chr X from 338266-339264_ Verified ORF_ "Glyceraldehyde-3-phosphate dehydrogenase_ isozyme 1_ involved in glycolysis and gluconeogenesis; tetramer that catalyzes the reaction of glyceraldehyde-3-phosphate to 1_3 bis-phosphoglycerate; detected in the cytoplasm and cell-wall"	20	980	92.44	2.09e-13
20	1	YLR299W ECM38 SGDID:S000004290_ Chr XII from 726071-728053_ Verified ORF_ "Gamma-glutamyltranspeptidase_ major glutathione-degrading enzyme; involved in detoxification of electrophilic xenobiotics; expression induced mainly by nitrogen starvation"	20	86	71.194	1.71e-08
21	1	YPL240C HSP82 SGDID:S000006161_ Chr XVI from 98625-96496_ reverse complement_ Verified ORF_ "Hsp90 chaperone required for pheromone signaling and negative regulation of Hsf1p; docks with Tom70p for mitochondrial preprotein delivery; promotes telomerase DNA binding and nucleotide addition; interacts with Cns1p_ Cpr6p_ Cpr7p_ Sti1p"	20	202	73.436	7.99e-08
22	1	YDR483W KRE2 SGDID:S000002891_ Chr IV from 1421150-1422478_ Verified ORF_ "Alpha1_2-mannosyltransferase of the Golgi involved in protein mannosylation"	20	197	82.583	1.13e-09
23	1	YLR355C ILV5 SGDID:S000004347_ Chr XII from 839252-838065_ reverse complement_ Verified ORF_ "Acetohydroxyacid reductoisomerase_ mitochondrial protein involved in branched-chain amino acid biosynthesis_ also required for maintenance of wild-type mitochondrial DNA and found in mitochondrial nucleoids"	19	93	67.968	2.33e-09
24	1	YKL060C FBA1 SGDID:S000001543_ Chr XI from 327131-326052_ reverse complement_ Verified ORF_ "Fructose 1_6-bisphosphate aldolase_ required for glycolysis and gluconeogenesis; catalyzes conversion of fructose 1_6 bisphosphate to glyceraldehyde-3-P and dihydroxyacetone-P; locates to mitochondrial outer surface upon oxidative stress"	19	744	84.416	6.66e-15
25	1	YCL057W PRD1 SGDID:S000000562_ Chr III from 24768-26906_ Verified ORF_ "Zinc metalloendopeptidase_ found in the cytoplasm and intermembrane space of mitochondria; with Cym1p_ involved in degradation of mitochondrial proteins and of presequence peptides cleaved from imported proteins"	19	89	63.351	2.17e-05
26	1	YJL130C URA2 SGDID:S000003666_ Chr X from 172364-165720_ reverse complement_ Verified ORF_ "Bifunctional carbamoylphosphate synthetase (CPSase)-aspartate transcarbamylase (ATCase)_ catalyzes the first two enzymatic steps in the de novo biosynthesis of pyrimidines; both activities are subject to feedback inhibition by UTP"	18	33	50.247	7.46e-06
27	1	YBR199W KTR4 SGDID:S000000403_ Chr II from 618904-620298_ Verified ORF_ "Putative mannosyltransferase involved in protein glycosylation; member of the KRE2/MNT1 mannosyltransferase family"	18	148	69.261	3.61e-09
28	1	YOL086C ADH1 SGDID:S000005446_ Chr XV from 160594-159548_ reverse complement_ Verified ORF_ "Alcohol dehydrogenase_ fermentative isozyme active as homo- or heterotetramers; required for the reduction of acetaldehyde to ethanol_ the last step in the glycolytic pathway"	17	554	74.422	6.34e-07
29	1	YOR375C GDH1 SGDID:S000005902_ Chr XV from 1043040-1041676_ reverse complement_ Verified ORF_ "NADP(+)-dependent glutamate dehydrogenase_ synthesizes glutamate from ammonia and alpha-ketoglutarate; rate of alpha-ketoglutarate utilization differs from Gdh3p; expression regulated by nitrogen and carbon sources"	17	40	54.522	8.08e-05
30	1	YGL008C PMA1 SGDID:S000002976_ Chr VII from 482671-479915_ reverse complement_ Verified ORF_ "Plasma membrane H+-ATPase_ pumps protons out of the cell; major regulator of cytoplasmic pH and plasma membrane potential; part of the P2 subgroup of cation-transporting ATPases"	17	91	69.936	3.54e-08
30	2	YPL036W PMA2 SGDID:S000005957_ Chr XVI from 482841-485684_ Verified ORF_ "Plasma membrane H+-ATPase_ isoform of Pma1p_ involved in pumping protons out of the cell; regulator of cytoplasmic pH and plasma membrane potential"	14	81	61.072	3.54e-08
31	1	YFR044C DUG1 SGDID:S000001940_ Chr VI from 241424-239979_ reverse complement_ Verified ORF_ "Probable di- and tri-peptidase; forms a complex with Dug2p and Dug3p to degrade glutathione (GSH) and other peptides containing a gamma-glu-X bond in an alternative pathway to GSH degradation by gamma-glutamyl transpeptidase (Ecm38p)"	15	102	58.253	7.62e-09
32	1	YDL045C FAD1 SGDID:S000002203_ Chr IV from 373605-372685_ reverse complement_ Verified ORF_ "Flavin adenine dinucleotide (FAD) synthetase_ performs the second step in synthesis of FAD from riboflavin"	15	52	56.39	1.69e-08
33	1	YGR180C RNR4 SGDID:S000003412_ Chr VII from 856306-855269_ reverse complement_ Verified ORF_ "Ribonucleotide-diphosphate reductase (RNR)_ small subunit; the RNR complex catalyzes the rate-limiting step in dNTP synthesis and is regulated by DNA replication and DNA damage checkpoint pathways via localization of the small subunits"	15	121	61.037	6.18e-10
34	1	YGR279C SCW4 SGDID:S000003511_ Chr VII from 1049965-1048805_ reverse complement_ Verified ORF_ "Cell wall protein with similarity to glucanases; scw4 scw10 double mutants exhibit defects in mating"	14	2830	66.866	3.33e-15
35	1	YOL011W PLB3 SGDID:S000005371_ Chr XV from 305350-307410_ Verified ORF_ "Phospholipase B (lysophospholipase) involved in phospholipid metabolism; hydrolyzes phosphatidylinositol and phosphatidylserine and displays transacylase activity in vitro"	14	119	52.272	4.96e-10
36	1	YGR087C PDC6 SGDID:S000003319_ Chr VII from 652985-651294_ reverse complement_ Verified ORF_ "Minor isoform of pyruvate decarboxylase_ decarboxylates pyruvate to acetaldehyde_ involved in amino acid catabolism; transcription is glucose- and ethanol-dependent_ and is strongly induced during sulfur limitation"	14	258	55.265	3.31e-08
37	1	YBL075C SSA3 SGDID:S000000171_ Chr II from 86446-84497_ reverse complement_ Verified ORF_ "ATPase involved in protein folding and the response to stress; plays a role in SRP-dependent cotranslational protein-membrane targeting and translocation; member of the heat shock protein 70 (HSP70) family; localized to the cytoplasm"	14	134	46.353	1.56e-05
38	1	YMR305C SCW10 SGDID:S000004921_ Chr XIII from 880231-879062_ reverse complement_ Verified ORF_ "Cell wall protein with similarity to glucanases; may play a role in conjugation during mating based on mutant phenotype and its regulation by Ste12p"	14	730	59.34	1.52e-12
39	1	YCR053W THR4 SGDID:S000000649_ Chr III from 216693-218237_ Verified ORF_ "Threonine synthase_ conserved protein that catalyzes formation of threonine from 0-phosphohomoserine; expression is regulated by the GCN4-mediated general amino acid control pathway"	13	98	48.472	1e-06
40	1	YNL209W SSB2 SGDID:S000005153_ Chr XIV from 252060-253901_ Verified ORF_ "Cytoplasmic ATPase that is a ribosome-associated molecular chaperone_ functions with J-protein partner Zuo1p; may be involved in the folding of newly-synthesized polypeptide chains; member of the HSP70 family; homolog of SSB1"	13	101	48.588	0.000399
41	1	YPL154C PEP4 SGDID:S000006075_ Chr XVI from 260930-259713_ reverse complement_ Verified ORF_ "Vacuolar aspartyl protease (proteinase A)_ required for the posttranslational precursor maturation of vacuolar proteinases; important for protein turnover after oxidative damage; synthesized as a zymogen_ self-activates"	13	85	52.402	3.29e-06
42	1	YOR133W EFT1 SGDID:S000005659_ Chr XV from 575099-577627_ Verified ORF_ "Elongation factor 2 (EF-2)_ also encoded by EFT2; catalyzes ribosomal translocation during protein synthesis; contains diphthamide_ the unique posttranslationally modified histidine residue specifically ADP-ribosylated by diphtheria toxin"	13	31	45.115	0.000126
42	2	YDR385W EFT2 SGDID:S000002793_ Chr IV from 1243223-1245751_ Verified ORF_ "Elongation factor 2 (EF-2)_ also encoded by EFT1; catalyzes ribosomal translocation during protein synthesis; contains diphthamide_ the unique posttranslationally modified histidine residue specifically ADP-ribosylated by diphtheria toxin"	13	31	45.115	0.000126
43	1	YLR134W PDC5 SGDID:S000004124_ Chr XII from 410724-412415_ Verified ORF_ "Minor isoform of pyruvate decarboxylase_ key enzyme in alcoholic fermentation_ decarboxylates pyruvate to acetaldehyde_ regulation is glucose- and ethanol-dependent_ repressed by thiamine_ involved in amino acid catabolism"	13	271	47.912	1.92e-06
43	2	YDL080C THI3 SGDID:S000002238_ Chr IV from 312471-310642_ reverse complement_ Verified ORF_ "Probable alpha-ketoisocaproate decarboxylase_ may have a role in catabolism of amino acids to long-chain and complex alcohols; required for expression of enzymes involved in thiamine biosynthesis"	1	15	4.402	3.31e-08
44	1	YDR050C TPI1 SGDID:S000002457_ Chr IV from 556471-555725_ reverse complement_ Verified ORF_ "Triose phosphate isomerase_ abundant glycolytic enzyme; mRNA half-life is regulated by iron availability; transcription is controlled by activators Reb1p_ Gcr1p_ and Rap1p through binding sites in the 5' non-coding region"	13	581	58.535	3.22e-14
45	1	YFL039C ACT1 SGDID:S000001855_ Chr VI from 54695-54686_54377-53260_ reverse complement_ Verified ORF_ "Actin_ structural protein involved in cell polarization_ endocytosis_ and other cytoskeletal functions"	13	100	53.177	6.31e-10
46	1	YDL229W SSB1 SGDID:S000002388_ Chr IV from 44066-45907_ Verified ORF_ "Cytoplasmic ATPase that is a ribosome-associated molecular chaperone_ functions with J-protein partner Zuo1p; may be involved in folding of newly-made polypeptide chains; member of the HSP70 family; interacts with phosphatase subunit Reg1p"	13	101	49.308	0.000203
47	1	YER043C SAH1 SGDID:S000000845_ Chr V from 237118-235769_ reverse complement_ Verified ORF_ "S-adenosyl-L-homocysteine hydrolase_ catabolizes S-adenosyl-L-homocysteine which is formed after donation of the activated methyl group of S-adenosyl-L-methionine (AdoMet) to an acceptor"	13	90	44.216	2.42e-07
48	1	YJL153C INO1 SGDID:S000003689_ Chr X from 135930-134329_ reverse complement_ Verified ORF_ "Inositol 1-phosphate synthase_ involved in synthesis of inositol phosphates and inositol-containing phospholipids; transcription is coregulated with other phospholipid biosynthetic genes by Ino2p and Ino4p_ which bind the UASINO DNA element"	13	89	49.873	3.01e-07
49	1	YGL203C KEX1 SGDID:S000003171_ Chr VII from 114668-112479_ reverse complement_ Verified ORF_ "Protease involved in the processing of killer toxin and alpha factor precursor; cleaves Lys and Arg residues from the C-terminus of peptides and proteins"	13	49	45.436	6.8e-06
50	1	YCL043C PDI1 SGDID:S000000548_ Chr III from 50221-48653_ reverse complement_ Verified ORF_ "Protein disulfide isomerase_ multifunctional protein resident in the endoplasmic reticulum lumen_ essential for the formation of disulfide bonds in secretory and cell-surface proteins_ unscrambles non-native disulfide bonds"	12	57	46.036	7.49e-08
51	1	YPR080W TEF1 SGDID:S000006284_ Chr XVI from 700592-701968_ Verified ORF_ "Translational elongation factor EF-1 alpha; also encoded by TEF2; functions in the binding reaction of aminoacyl-tRNA (AA-tRNA) to ribosomes"	12	91	42.905	4.17e-06
51	2	YBR118W TEF2 SGDID:S000000322_ Chr II from 477665-479041_ Verified ORF_ "Translational elongation factor EF-1 alpha; also encoded by TEF1; functions in the binding reaction of aminoacyl-tRNA (AA-tRNA) to ribosomes"	12	91	42.905	4.17e-06
52	1	YDL124W YDL124W SGDID:S000002282_ Chr IV from 240259-241197_ Verified ORF_ "NADPH-dependent alpha-keto amide reductase; reduces aromatic alpha-keto amides_ aliphatic alpha-keto esters_ and aromatic alpha-keto esters; member of the aldo-keto reductase (AKR) family"	12	86	43.08	1.63e-07
53	1	YMR215W GAS3 SGDID:S000004828_ Chr XIII from 696795-698369_ Verified ORF_ "Putative 1_3-beta-glucanosyltransferase_ has similarity to Gas1p; localizes to the cell wall"	12	77	54.768	1.11e-15
54	1	YML126C ERG13 SGDID:S000004595_ Chr XIII from 20536-19061_ reverse complement_ Verified ORF_ "3-hydroxy-3-methylglutaryl-CoA (HMG-CoA) synthase_ catalyzes the formation of HMG-CoA from acetyl-CoA and acetoacetyl-CoA; involved in the second step in mevalonate biosynthesis"	12	37	44.283	5.01e-06
55	1	YKL182W FAS1 SGDID:S000001665_ Chr XI from 100676-106831_ Verified ORF_ "Beta subunit of fatty acid synthetase_ which catalyzes the synthesis of long-chain saturated fatty acids; contains acetyltransacylase_ dehydratase_ enoyl reductase_ malonyl transacylase_ and palmitoyl transacylase activities"	11	21	31.092	5.04e-05
56	1	YBR011C IPP1 SGDID:S000000215_ Chr II from 257973-257110_ reverse complement_ Verified ORF_ "Cytoplasmic inorganic pyrophosphatase (PPase)_ catalyzes the rapid exchange of oxygens from Pi with water_ highly expressed and essential for viability_ active-site residues show identity to those from E. coli PPase"	11	99	46.901	1.52e-08
57	1	YDR262W YDR262W SGDID:S000002670_ Chr IV from 993131-993949_ Uncharacterized ORF_ "Putative protein of unknown function; green fluorescent protein (GFP)-fusion protein localizes to the vacuole and is induced in response to the DNA-damaging agent MMS; gene expression increases in response to Zymoliase treatment"	11	101	43.175	1.56e-09
58	1	YMR307W GAS1 SGDID:S000004924_ Chr XIII from 887002-888681_ Verified ORF_ "Beta-1_3-glucanosyltransferase_ required for cell wall assembly; localizes to the cell surface via a glycosylphosphatidylinositol (GPI) anchor"	11	132	45.688	1.63e-11
59	1	YLR249W YEF3 SGDID:S000004239_ Chr XII from 636782-639916_ Verified ORF_ "Translational elongation factor 3_ stimulates the binding of aminoacyl-tRNA (AA-tRNA) to ribosomes by releasing EF-1 alpha from the ribosomal complex; contains two ABC cassettes; binds and hydrolyses ATP"	11	35	33.933	0.000345
59	2	YNL014W HEF3 SGDID:S000004959_ Chr XIV from 606320-609454_ Verified ORF_ "Translational elongation factor EF-3; paralog of YEF3 and member of the ABC superfamily; stimulates EF-1 alpha-dependent binding of aminoacyl-tRNA by the ribosome; normally expressed in zinc deficient cells"	2	8	5.864	0.000345
60	1	YLR354C TAL1 SGDID:S000004346_ Chr XII from 837356-836349_ reverse complement_ Verified ORF_ "Transaldolase_ enzyme in the non-oxidative pentose phosphate pathway; converts sedoheptulose 7-phosphate and glyceraldehyde 3-phosphate to erythrose 4-phosphate and fructose 6-phosphate"	11	91	43.047	6.56e-07
61	1	YLR109W AHP1 SGDID:S000004099_ Chr XII from 368782-369312_ Verified ORF_ "Thiol-specific peroxiredoxin_ reduces hydroperoxides to protect against oxidative damage; function in vivo requires covalent conjugation to Urm1p"	11	147	42.689	3.97e-09
62	1	YAL012W CYS3 SGDID:S000000010_ Chr I from 130802-131986_ Verified ORF_ "Cystathionine gamma-lyase_ catalyzes one of the two reactions involved in the transsulfuration pathway that yields cysteine from homocysteine with the intermediary formation of cystathionine"	11	37	39.265	0.000444
63	1	YGR282C BGL2 SGDID:S000003514_ Chr VII from 1058731-1057790_ reverse complement_ Verified ORF_ "Endo-beta-1_3-glucanase_ major protein of the cell wall_ involved in cell wall maintenance"	11	667	50.353	2.85e-13
64	1	YJR105W ADO1 SGDID:S000003866_ Chr X from 623570-624592_ Verified ORF_ "Adenosine kinase_ required for the utilization of S-adenosylmethionine (AdoMet); may be involved in recycling adenosine produced through the methyl cycle"	11	50	41.92	1.18e-06
65	1	YHR179W OYE2 SGDID:S000001222_ Chr VIII from 462502-463704_ Verified ORF_ "Widely conserved NADPH oxidoreductase containing flavin mononucleotide (FMN)_ homologous to Oye3p with slight differences in ligand binding and catalytic properties; may be involved in sterol metabolism"	11	58	40.48	9.62e-05
65	2	YPL171C OYE3 SGDID:S000006092_ Chr XVI from 227370-226168_ reverse complement_ Verified ORF_ "Widely conserved NADPH oxidoreductase containing flavin mononucleotide (FMN)_ homologous to Oye2p with slight differences in ligand binding and catalytic properties; may be involved in sterol metabolism"	2	7	5.666	6.06e-09
66	1	YLR121C YPS3 SGDID:S000004111_ Chr XII from 390271-388745_ reverse complement_ Verified ORF_ "Aspartic protease_ attached to the plasma membrane via a glycosylphosphatidylinositol (GPI) anchor"	11	240	59.877	1.75e-12
67	1	YGL202W ARO8 SGDID:S000003170_ Chr VII from 116063-117565_ Verified ORF_ "Aromatic aminotransferase I_ expression is regulated by general control of amino acid biosynthesis"	11	60	45.982	3.36e-06
68	1	YPR145W ASN1 SGDID:S000006349_ Chr XVI from 822616-824334_ Verified ORF_ "Asparagine synthetase_ isozyme of Asn2p; catalyzes the synthesis of L-asparagine from L-aspartate in the asparagine biosynthetic pathway"	10	35	33.674	5.67e-05
69	1	YCL018W LEU2 SGDID:S000000523_ Chr III from 91324-92418_ Verified ORF_ "Beta-isopropylmalate dehydrogenase (IMDH)_ catalyzes the third step in the leucine biosynthesis pathway"	10	25	33.181	0.000503
70	1	YOR335C ALA1 SGDID:S000005862_ Chr XV from 949106-946230_ reverse complement_ Verified ORF_ "Cytoplasmic alanyl-tRNA synthetase_ required for protein synthesis; point mutation (cdc64-1 allele) causes cell cycle arrest at G1; lethality of null mutation is functionally complemented by human homolog"	10	18	31.389	0.00087
71	1	YGR234W YHB1 SGDID:S000003466_ Chr VII from 959908-961107_ Verified ORF_ "Nitric oxide oxidoreductase_ flavohemoglobin involved in nitric oxide detoxification; plays a role in the oxidative and nitrosative stress responses"	10	31	38.172	5.88e-05
72	1	YDR044W HEM13 SGDID:S000002451_ Chr IV from 546641-547627_ Verified ORF_ "Coproporphyrinogen III oxidase_ an oxygen requiring enzyme that catalyzes the sixth step in the heme biosynthetic pathway; localizes to the mitochondrial inner membrane; transcription is repressed by oxygen and heme (via Rox1p and Hap1p)"	10	20	36.822	1
73	1	YER103W SSA4 SGDID:S000000905_ Chr V from 364585-366513_ Verified ORF_ "Heat shock protein that is highly induced upon stress; plays a role in SRP-dependent cotranslational protein-membrane targeting and translocation; member of the HSP70 family; cytoplasmic protein that concentrates in nuclei upon starvation"	10	109	35.998	1
74	1	YLR245C CDD1 SGDID:S000004235_ Chr XII from 626932-626504_ reverse complement_ Verified ORF_ "Cytidine deaminase; catalyzes the modification of cytidine to uridine in vitro but native RNA substrates have not been identified_ localizes to both the nucleus and cytoplasm"	10	39	31.898	1.94e-06
75	1	YMR120C ADE17 SGDID:S000004727_ Chr XIII from 509279-507501_ reverse complement_ Verified ORF_ "Enzyme of 'de novo' purine biosynthesis containing both 5-aminoimidazole-4-carboxamide ribonucleotide transformylase and inosine monophosphate cyclohydrolase activities_ isozyme of Ade16p; ade16 ade17 mutants require adenine and histidine"	10	20	35.181	9.58e-05
76	1	YGR256W GND2 SGDID:S000003488_ Chr VII from 1004630-1006108_ Verified ORF_ "6-phosphogluconate dehydrogenase (decarboxylating)_ catalyzes an NADPH regenerating reaction in the pentose phosphate pathway; required for growth on D-glucono-delta-lactone"	10	44	36.398	6.93e-06
77	1	YGL245W GUS1 SGDID:S000003214_ Chr VII from 39023-41149_ Verified ORF_ "Glutamyl-tRNA synthetase (GluRS)_ forms a complex with methionyl-tRNA synthetase (Mes1p) and Arc1p; complex formation increases the catalytic efficiency of both tRNA synthetases and ensures their correct localization to the cytoplasm"	10	26	28.357	0.00025
78	1	YER177W BMH1 SGDID:S000000979_ Chr V from 545606-546409_ Verified ORF_ "14-3-3 protein_ major isoform; controls proteome at post-transcriptional level_ binds proteins and DNA_ involved in regulation of many processes including exocytosis_ vesicle transport_ Ras/MAPK signaling_ and rapamycin-sensitive signaling"	10	104	36.609	1.48e-06
79	1	YIL053W RHR2 SGDID:S000001315_ Chr IX from 255113-255865_ Verified ORF_ "Constitutively expressed isoform of DL-glycerol-3-phosphatase; involved in glycerol biosynthesis_ induced in response to both anaerobic and_ along with the Hor2p/Gpp2p isoform_ osmotic stress"	10	39	35.046	1.02e-05
80	1	YLR342W FKS1 SGDID:S000004334_ Chr XII from 809997-815627_ Verified ORF_ "Catalytic subunit of 1_3-beta-D-glucan synthase_ functionally redundant with alternate catalytic subunit Gsc2p; binds to regulatory subunit Rho1p; involved in cell wall synthesis and maintenance; localizes to sites of cell wall remodeling"	10	23	37.064	3.72e-08
81	1	YPL225W YPL225W SGDID:S000006146_ Chr XVI from 126006-126446_ Verified ORF_ "Protein of unknown function that may interact with ribosomes_ based on co-purification experiments; green fluorescent protein (GFP)-fusion protein localizes to the cytoplasm"	10	142	38.897	6.41e-09
82	1	YMR297W PRC1 SGDID:S000004912_ Chr XIII from 861921-863519_ Verified ORF_ "Vacuolar carboxypeptidase Y (proteinase C)_ broad-specificity C-terminal exopeptidase involved in non-specific protein degradation in the vacuole; member of the serine carboxypeptidase family"	9	79	34.991	1.62e-08
83	1	YJL026W RNR2 SGDID:S000003563_ Chr X from 392399-393598_ Verified ORF_ "Ribonucleotide-diphosphate reductase (RNR)_ small subunit; the RNR complex catalyzes the rate-limiting step in dNTP synthesis and is regulated by DNA replication and DNA damage checkpoint pathways via localization of the small subunits"	9	65	33.44	2.34e-09
84	1	YMR079W SEC14 SGDID:S000004684_ Chr XIII from 424988-424996_425153-426058_ Verified ORF_ "Phosphatidylinositol/phosphatidylcholine transfer protein involved in coordinate regulation of PtdIns and PtdCho metabolism_ products of which are regulators in Golgi to plasma membrane transport; functionally homologous to mammalian PITPs"	9	13	25.851	0.000209
85	1	YMR105C PGM2 SGDID:S000004711_ Chr XIII from 477605-475896_ reverse complement_ Verified ORF_ "Phosphoglucomutase_ catalyzes the conversion from glucose-1-phosphate to glucose-6-phosphate_ which is a key step in hexose metabolism; functions as the acceptor for a Glc-phosphotransferase"	9	17	26.061	9.91e-08
86	1	YOR230W WTM1 SGDID:S000005756_ Chr XV from 770801-772114_ Verified ORF_ "Transcriptional modulator involved in regulation of meiosis_ silencing_ and expression of RNR genes; required for nuclear localization of the ribonucleotide reductase small subunit Rnr2p and Rnr4p; contains WD repeats"	9	36	28.976	0.000321
87	1	YDR099W BMH2 SGDID:S000002506_ Chr IV from 653605-654426_ Verified ORF_ "14-3-3 protein_ minor isoform; controls proteome at post-transcriptional level_ binds proteins and DNA_ involved in regulation of many processes including exocytosis_ vesicle transport_ Ras/MAPK signaling_ and rapamycin-sensitive signaling"	9	91	32.708	6.71e-09
88	1	YGR124W ASN2 SGDID:S000003356_ Chr VII from 739949-741667_ Verified ORF_ "Asparagine synthetase_ isozyme of Asn1p; catalyzes the synthesis of L-asparagine from L-aspartate in the asparagine biosynthetic pathway"	9	34	29.501	1
89	1	YLL026W HSP104 SGDID:S000003949_ Chr XII from 88622-91348_ Verified ORF_ "Heat shock protein that cooperates with Ydj1p (Hsp40) and Ssa1p (Hsp70) to refold and reactivate previously denatured_ aggregated proteins; responsive to stresses including: heat_ ethanol_ and sodium arsenite; involved in [PSI+] propagation"	9	12	27.759	1.11e-08
90	1	YNL134C YNL134C SGDID:S000005078_ Chr XIV from 373583-372453_ reverse complement_ Uncharacterized ORF_ "Putative protein of unknown function with similarity to dehydrogenases from other model organisms; green fluorescent protein (GFP)-fusion protein localizes to both the cytoplasm and nucleus and is induced by the DNA-damaging agent MMS"	9	70	33.502	2.97e-10
91	1	YEL047C YEL047C SGDID:S000000773_ Chr V from 66797-65385_ reverse complement_ Verified ORF_ "Soluble fumarate reductase_ required with isoenzyme Osm1p for anaerobic growth; may interact with ribosomes_ based on co-purification experiments; authentic_ non-tagged protein is detected in purified mitochondria in high-throughput studies"	9	45	31.795	8.09e-05
92	1	YNR067C DSE4 SGDID:S000005350_ Chr XIV from 759099-755746_ reverse complement_ Verified ORF_ "Daughter cell-specific secreted protein with similarity to glucanases_ degrades cell wall from the daughter side causing daughter to separate from mother"	9	53	37.144	1.68e-07
93	1	YKL152C GPM1 SGDID:S000001635_ Chr XI from 164390-163647_ reverse complement_ Verified ORF_ "Tetrameric phosphoglycerate mutase_ mediates the conversion of 3-phosphoglycerate to 2-phosphoglycerate during glycolysis and the reverse reaction during gluconeogenesis"	9	185	34.076	2.43e-09
94	1	YGR032W GSC2 SGDID:S000003264_ Chr VII from 548268-553955_ Verified ORF_ "Catalytic subunit of 1_3-beta-glucan synthase_ involved in formation of the inner layer of the spore wall; activity positively regulated by Rho1p and negatively by Smk1p; has similarity to an alternate catalytic subunit_ Fks1p (Gsc1p)"	9	24	34.83	1.86e-12
95	1	YKR097W PCK1 SGDID:S000001805_ Chr XI from 630790-632439_ Verified ORF_ "Phosphoenolpyruvate carboxykinase_ key enzyme in gluconeogenesis_ catalyzes early reaction in carbohydrate biosynthesis_ glucose represses transcription and accelerates mRNA degradation_ regulated by Mcm1p and Cat8p_ located in the cytosol"	9	26	32.343	2.19e-07
96	1	YDR368W YPR1 SGDID:S000002776_ Chr IV from 1213897-1214835_ Verified ORF_ "2-methylbutyraldehyde reductase_ may be involved in isoleucine catabolism"	9	30	32.474	7.43e-06
97	1	YMR169C ALD3 SGDID:S000004779_ Chr XIII from 600871-599351_ reverse complement_ Verified ORF_ "Cytoplasmic aldehyde dehydrogenase_ involved in beta-alanine synthesis; uses NAD+ as the preferred coenzyme; very similar to Ald2p; expression is induced by stress and repressed by glucose"	9	19	29.8	5.75e-08
97	2	YMR170C ALD2 SGDID:S000004780_ Chr XIII from 603081-601561_ reverse complement_ Verified ORF_ "Cytoplasmic aldehyde dehydrogenase_ involved in ethanol oxidation and beta-alanine biosynthesis; uses NAD+ as the preferred coenzyme; expression is stress induced and glucose repressed; very similar to Ald3p"	4	7	13.13	5.75e-08
98	1	YGR061C ADE6 SGDID:S000003293_ Chr VII from 615969-611893_ reverse complement_ Verified ORF_ "Formylglycinamidine-ribonucleotide (FGAM)-synthetase_ catalyzes a step in the 'de novo' purine nucleotide biosynthetic pathway"	9	18	28.777	0.000132
99	1	YJL171C YJL171C SGDID:S000003707_ Chr X from 100888-99698_ reverse complement_ Verified ORF_ "GPI-anchored cell wall protein of unknown function; induced in response to cell wall damaging agents and by mutations in genes involved in cell wall biogenesis; sequence similarity to YBR162C/TOS1_ a covalently bound cell wall protein"	9	246	41.52	2.3e-09
100	1	YAR071W PHO11 SGDID:S000000094_ Chr I from 225451-226854_ Verified ORF_ "One of three repressible acid phosphatases_ a glycoprotein that is transported to the cell surface by the secretory pathway; induced by phosphate starvation and coordinately regulated by PHO4 and PHO2"	8	58	31.618	7.63e-09
100	2	YHR215W PHO12 SGDID:S000001258_ Chr VIII from 552099-553502_ Verified ORF_ "One of three repressible acid phosphatases_ a glycoprotein that is transported to the cell surface by the secretory pathway; nearly identical to Pho11p; upregulated by phosphate starvation"	8	58	31.618	7.63e-09
101	1	YDR304C CPR5 SGDID:S000002712_ Chr IV from 1072554-1071877_ reverse complement_ Verified ORF_ "Peptidyl-prolyl cis-trans isomerase (cyclophilin) of the endoplasmic reticulum_ catalyzes the cis-trans isomerization of peptide bonds N-terminal to proline residues; transcriptionally induced in response to unfolded proteins in the ER"	8	29	31.138	2.58e-11
102	1	YKR059W TIF1 SGDID:S000001767_ Chr XI from 554629-555816_ Verified ORF_ "Translation initiation factor eIF4A_ identical to Tif2p; DEA(D/H)-box RNA helicase that couples ATPase activity to RNA binding and unwinding; forms a dumbbell structure of two compact domains connected by a linker; interacts with eIF4G"	8	22	27.09	1.61e-08
102	2	YJL138C TIF2 SGDID:S000003674_ Chr X from 154688-153501_ reverse complement_ Verified ORF_ "Translation initiation factor eIF4A_ identical to Tif1p; DEA(D/H)-box RNA helicase that couples ATPase activity to RNA binding and unwinding; forms a dumbbell structure of two compact domains connected by a linker; interacts with eIF4G"	8	22	27.09	1.61e-08
103	1	YMR116C ASC1 SGDID:S000004722_ Chr XIII from 500687-500151_499877-499455_ reverse complement_ Verified ORF_ "G-protein beta subunit and guanine nucleotide dissociation inhibitor for Gpa2p; ortholog of RACK1 that inhibits translation; core component of the small (40S) ribosomal subunit; represses Gcn4p in the absence of amino acid starvation"	8	47	27.122	6.27e-06
104	1	YKL157W APE2 SGDID:S000001640_ Chr XI from 154996-155276_155660-158186_ Verified ORF_ "Zinc-dependent metallopeptidase yscII_ may have a role in obtaining leucine from dipeptide substrates; sequence coordinates have changed since RT-PCR analysis showed that the adjacent ORF YKL158W comprises the 5' exon of APE2/YKL157W"	8	25	22.145	7.07e-05
105	1	YPR069C SPE3 SGDID:S000006273_ Chr XVI from 685434-684553_ reverse complement_ Verified ORF_ "Spermidine synthase_ involved in biosynthesis of spermidine and also in biosynthesis of pantothenic acid; spermidine is required for growth of wild-type cells"	8	26	24.43	1.55e-07
106	1	YJR048W CYC1 SGDID:S000003809_ Chr X from 526328-526657_ Verified ORF_ "Cytochrome c_ isoform 1; electron carrier of the mitochondrial intermembrane space that transfers electrons from ubiquinone-cytochrome c oxidoreductase to cytochrome c oxidase during cellular respiration"	8	154	31.734	7.63e-06
106	2	YEL039C CYC7 SGDID:S000000765_ Chr V from 79977-79636_ reverse complement_ Verified ORF_ "Cytochrome c isoform 2_ expressed under hypoxic conditions; electron carrier of the mitochondrial intermembrane space that transfers electrons from ubiquinone-cytochrome c oxidoreductase to cytochrome c oxidase during cellular respiration"	1	53	3.825	3.39e-08
107	1	YGR240C PFK1 SGDID:S000003472_ Chr VII from 973739-970776_ reverse complement_ Verified ORF_ "Alpha subunit of heterooctameric phosphofructokinase involved in glycolysis_ indispensable for anaerobic growth_ activated by fructose-2_6-bisphosphate and AMP_ mutation inhibits glucose induction of cell cycle-related genes"	8	14	22.998	0.000276
108	1	YDL055C PSA1 SGDID:S000002213_ Chr IV from 356759-355674_ reverse complement_ Verified ORF_ "GDP-mannose pyrophosphorylase (mannose-1-phosphate guanyltransferase)_ synthesizes GDP-mannose from GTP and mannose-1-phosphate in cell wall biosynthesis; required for normal cell wall structure"	8	51	32.172	1.74e-08
109	1	YJR139C HOM6 SGDID:S000003900_ Chr X from 690515-689436_ reverse complement_ Verified ORF_ "Homoserine dehydrogenase (L-homoserine:NADP oxidoreductase)_ dimeric enzyme that catalyzes the third step in the common pathway for methionine and threonine biosynthesis; enzyme has nucleotide-binding_ dimerization and catalytic regions"	8	61	29.672	8.97e-07
110	1	YLR178C TFS1 SGDID:S000004168_ Chr XII from 513823-513164_ reverse complement_ Verified ORF_ "Carboxypeptidase Y inhibitor_ function requires acetylation by the NatB N-terminal acetyltransferase; phosphatidylethanolamine-binding protein involved in protein kinase A signaling pathway"	7	21	21.526	0.000183
111	1	YLR179C YLR179C SGDID:S000004169_ Chr XII from 514715-514110_ reverse complement_ Uncharacterized ORF_ "Protein of unknown function_ transcription is activated by paralogous proteins Yrm1p and Yrr1p along with proteins involved in multidrug resistance; GFP-tagged protein localizes to the cytoplasm and nucleus; YLR179C is not essential"	7	56	29.195	1.83e-07
112	1	YBR072W HSP26 SGDID:S000000276_ Chr II from 382027-382671_ Verified ORF_ "Small heat shock protein (sHSP) with chaperone activity; forms hollow_ sphere-shaped oligomers that suppress unfolded proteins aggregation; oligomer activation requires a heat-induced conformational change; not expressed in unstressed cells"	7	29	25.327	0.000342
113	1	YLR058C SHM2 SGDID:S000004048_ Chr XII from 259402-257993_ reverse complement_ Verified ORF_ "Cytosolic serine hydroxymethyltransferase_ converts serine to glycine plus 5_10 methylenetetrahydrofolate; major isoform involved in generating precursors for purine_ pyrimidine_ amino acid_ and lipid biosynthesis"	7	30	25.34	2.13e-05
114	1	YDR155C CPR1 SGDID:S000002562_ Chr IV from 768998-768510_ reverse complement_ Verified ORF_ "Cytoplasmic peptidyl-prolyl cis-trans isomerase (cyclophilin)_ catalyzes the cis-trans isomerization of peptide bonds N-terminal to proline residues; binds the drug cyclosporin A"	7	147	28.351	1.45e-11
115	1	YHR008C SOD2 SGDID:S000001050_ Chr VIII from 123585-122884_ reverse complement_ Verified ORF_ "Mitochondrial superoxide dismutase_ protects cells against oxygen toxicity; phosphorylated"	7	177	29.02	1.71e-10
116	1	YKL216W URA1 SGDID:S000001699_ Chr XI from 25216-26160_ Verified ORF_ "Dihydroorotate dehydrogenase_ catalyzes the fourth enzymatic step in the de novo biosynthesis of pyrimidines_ converting dihydroorotic acid into orotic acid"	7	20	27.039	6.19e-08
117	1	YPL106C SSE1 SGDID:S000006027_ Chr XVI from 352272-350191_ reverse complement_ Verified ORF_ "ATPase that is a component of the heat shock protein Hsp90 chaperone complex; binds unfolded proteins; member of the heat shock protein 70 (HSP70) family; localized to the cytoplasm"	7	37	24.318	1
118	1	YGL028C SCW11 SGDID:S000002996_ Chr VII from 442914-441286_ reverse complement_ Verified ORF_ "Cell wall protein with similarity to glucanases; may play a role in conjugation during mating based on its regulation by Ste12p"	7	99	36.575	1.33e-12
119	1	YKL210W UBA1 SGDID:S000001693_ Chr XI from 39164-42238_ Verified ORF_ "Ubiquitin activating enzyme (E1)_ involved in ubiquitin-mediated protein degradation and essential for viability"	7	10	18.898	1
120	1	YJR121W ATP2 SGDID:S000003882_ Chr X from 647598-649133_ Verified ORF_ "Beta subunit of the F1 sector of mitochondrial F1F0 ATP synthase_ which is a large_ evolutionarily conserved enzyme complex required for ATP synthesis; phosphorylated"	7	14	21.126	0.000174
121	1	YAL062W GDH3 SGDID:S000000058_ Chr I from 31568-32941_ Verified ORF_ "NADP(+)-dependent glutamate dehydrogenase_ synthesizes glutamate from ammonia and alpha-ketoglutarate; rate of alpha-ketoglutarate utilization differs from Gdh1p; expression regulated by nitrogen and carbon sources"	7	16	20.588	8.08e-05
122	1	YPR074C TKL1 SGDID:S000006278_ Chr XVI from 694835-692793_ reverse complement_ Verified ORF_ "Transketolase_ similar to Tkl2p; catalyzes conversion of xylulose-5-phosphate and ribose-5-phosphate to sedoheptulose-7-phosphate and glyceraldehyde-3-phosphate in the pentose phosphate pathway; needed for synthesis of aromatic amino acids"	7	20	25.41	6.08e-05
123	1	YML028W TSA1 SGDID:S000004490_ Chr XIII from 220138-220728_ Verified ORF_ "Thioredoxin peroxidase_ acts as both a ribosome-associated and free cytoplasmic antioxidant; self-associates to form a high-molecular weight chaperone complex under oxidative stress; deletion results in mutator phenotype"	7	94	29.818	2.18e-11
124	1	YGL026C TRP5 SGDID:S000002994_ Chr VII from 448540-446417_ reverse complement_ Verified ORF_ "Tryptophan synthase involved in tryptophan biosynthesis_ regulated by the general control system of amino acid biosynthesis"	7	13	20.634	3.42e-05
125	1	YLR303W MET17 SGDID:S000004294_ Chr XII from 732544-733878_ Verified ORF_ "Methionine and cysteine synthase (O-acetyl homoserine-O-acetyl serine sulfhydrylase)_ required for sulfur amino acid synthesis"	7	28	22.996	5.62e-05
126	1	YNL117W MLS1 SGDID:S000005061_ Chr XIV from 406360-408024_ Verified ORF_ "Malate synthase_ enzyme of the glyoxylate cycle_ involved in utilization of non-fermentable carbon sources; expression is subject to carbon catabolite repression; localizes in peroxisomes during growth in oleic acid medium"	7	19	24.682	1.07e-05
127	1	YPL231W FAS2 SGDID:S000006152_ Chr XVI from 108652-114315_ Verified ORF_ "Alpha subunit of fatty acid synthetase_ which catalyzes the synthesis of long-chain saturated fatty acids; contains beta-ketoacyl reductase and beta-ketoacyl synthase activities; phosphorylated"	7	7	22.131	1
128	1	YDL022W GPD1 SGDID:S000002180_ Chr IV from 411823-412998_ Verified ORF_ "NAD-dependent glycerol-3-phosphate dehydrogenase_ key enzyme of glycerol synthesis_ essential for growth under osmotic stress; expression regulated by high-osmolarity glycerol response pathway; homolog of Gpd2p"	7	43	25.58	7.01e-09
129	1	YGR204W ADE3 SGDID:S000003436_ Chr VII from 905939-908779_ Verified ORF_ "Cytoplasmic trifunctional enzyme C1-tetrahydrofolate synthase_ involved in single carbon metabolism and required for biosynthesis of purines_ thymidylate_ methionine_ and histidine"	6	21	17.657	2.33e-05
130	1	YNR001C CIT1 SGDID:S000005284_ Chr XIV from 631063-629624_ reverse complement_ Verified ORF_ "Citrate synthase_ catalyzes the condensation of acetyl coenzyme A and oxaloacetate to form citrate; the rate-limiting enzyme of the TCA cycle; nuclear encoded mitochondrial protein"	6	10	17.305	8.04e-07
131	1	YOR332W VMA4 SGDID:S000005859_ Chr XV from 943653-944354_ Verified ORF_ "Subunit E of the eight-subunit V1 peripheral membrane domain of the vacuolar H+-ATPase (V-ATPase)_ an electrogenic proton pump found throughout the endomembrane system; required for the V1 domain to assemble onto the vacuolar membrane"	6	10	18.443	3.41e-05
132	1	YNL160W YGP1 SGDID:S000005104_ Chr XIV from 336547-337611_ Verified ORF_ "Cell wall-related secretory glycoprotein; induced by nutrient deprivation-associated growth arrest and upon entry into stationary phase; may be involved in adaptation prior to stationary phase entry; has similarity to Sps100p"	6	174	26.611	4.22e-14
133	1	YBL015W ACH1 SGDID:S000000111_ Chr II from 194125-195705_ Verified ORF_ "Acetyl-coA hydrolase_ primarily localized to mitochondria; phosphorylated; required for acetate utilization and for diploid pseudohyphal growth"	6	7	18.406	5.53e-05
134	1	YHR138C YHR138C SGDID:S000001180_ Chr VIII from 377702-377358_ reverse complement_ Uncharacterized ORF_ "Putative protein of unknown function; has similarity to Pbi2p; double null mutant lacking Pbi2p and Yhr138p exhibits highly fragmented vacuoles"	6	36	21.477	3.53e-06
135	1	YER003C PMI40 SGDID:S000000805_ Chr V from 159117-159087_158993-157735_ reverse complement_ Verified ORF_ "Mannose-6-phosphate isomerase_ catalyzes the interconversion of fructose-6-P and mannose-6-P; required for early steps in protein mannosylation"	6	9	17.49	0.000166
136	1	YKL085W MDH1 SGDID:S000001568_ Chr XI from 278767-279771_ Verified ORF_ "Mitochondrial malate dehydrogenase_ catalyzes interconversion of malate and oxaloacetate; involved in the tricarboxylic acid (TCA) cycle; phosphorylated"	6	16	22.26	9.82e-09
137	1	YOR099W KTR1 SGDID:S000005625_ Chr XV from 511826-513007_ Verified ORF_ "Alpha-1_2-mannosyltransferase involved in O- and N-linked protein glycosylation; type II membrane protein; member of the KRE2/MNT1 mannosyltransferase family"	6	45	23.256	3.5e-11
138	1	YLR027C AAT2 SGDID:S000004017_ Chr XII from 198086-196830_ reverse complement_ Verified ORF_ "Cytosolic aspartate aminotransferase_ involved in nitrogen metabolism; localizes to peroxisomes in oleate-grown cells"	6	15	19.197	2.95e-05
139	1	YDR226W ADK1 SGDID:S000002634_ Chr IV from 916483-917151_ Verified ORF_ "Adenylate kinase_ required for purine metabolism; localized to the cytoplasm and the mitochondria; lacks cleavable signal sequence"	6	12	19.545	2.07e-08
140	1	YFL018C LPD1 SGDID:S000001876_ Chr VI from 103121-101622_ reverse complement_ Verified ORF_ "Dihydrolipoamide dehydrogenase_ the lipoamide dehydrogenase component (E3) of the pyruvate dehydrogenase and 2-oxoglutarate dehydrogenase multi-enzyme complexes"	6	22	19.221	0.000145
141	1	YDR519W FPR2 SGDID:S000002927_ Chr IV from 1480418-1480825_ Verified ORF_ "Membrane-bound peptidyl-prolyl cis-trans isomerase (PPIase)_ binds to the drugs FK506 and rapamycin; expression pattern suggests possible involvement in ER protein trafficking"	6	26	22.765	4.55e-06
142	1	YGR155W CYS4 SGDID:S000003387_ Chr VII from 798548-800071_ Verified ORF_ "Cystathionine beta-synthase_ catalyzes the synthesis of cystathionine from serine and homocysteine_ the first committed step in cysteine biosynthesis"	6	14	20.833	2.36e-05
143	1	YDR158W HOM2 SGDID:S000002565_ Chr IV from 770355-771452_ Verified ORF_ "Aspartic beta semi-aldehyde dehydrogenase_ catalyzes the second step in the common pathway for methionine and threonine biosynthesis; expression regulated by Gcn4p and the general control of amino acid synthesis"	6	13	20.876	0.000745
144	1	YMR303C ADH2 SGDID:S000004918_ Chr XIII from 874336-873290_ reverse complement_ Verified ORF_ "Glucose-repressible alcohol dehydrogenase II_ catalyzes the conversion of ethanol to acetaldehyde; involved in the production of certain carboxylate esters; regulated by ADR1"	6	214	27.577	6.34e-07
145	1	YKL196C YKT6 SGDID:S000001679_ Chr XI from 75539-74937_ reverse complement_ Verified ORF_ "Vesicle membrane protein (v-SNARE) with acyltransferase activity; involved in trafficking to and within the Golgi_ endocytic trafficking to the vacuole_ and vacuolar fusion; membrane localization due to prenylation at the carboxy-terminus"	6	21	21.334	2.01e-05
146	1	YGR209C TRX2 SGDID:S000003441_ Chr VII from 913232-912918_ reverse complement_ Verified ORF_ "Cytoplasmic thioredoxin isoenzyme of the thioredoxin system which protects cells against oxidative and reductive stress_ forms LMA1 complex with Pbi2p_ acts as a cofactor for Tsa1p_ required for ER-Golgi transport and vacuole inheritance"	6	18	21.357	9.18e-07
147	1	YDR502C SAM2 SGDID:S000002910_ Chr IV from 1454457-1453303_ reverse complement_ Verified ORF_ "S-adenosylmethionine synthetase_ catalyzes transfer of the adenosyl group of ATP to the sulfur atom of methionine; one of two differentially regulated isozymes (Sam1p and Sam2p)"	6	23	20.642	1.7e-05
148	1	YLR304C ACO1 SGDID:S000004295_ Chr XII from 737550-735214_ reverse complement_ Verified ORF_ "Aconitase_ required for the tricarboxylic acid (TCA) cycle and also independently required for mitochondrial genome maintenance; phosphorylated; component of the mitochondrial nucleoid; mutation leads to glutamate auxotrophy"	6	15	16.309	0.00011
149	1	YDR032C PST2 SGDID:S000002439_ Chr IV from 504693-504097_ reverse complement_ Verified ORF_ "Protein with similarity to members of a family of flavodoxin-like proteins; induced by oxidative stress in a Yap1p dependent manner; the authentic_ non-tagged protein is detected in highly purified mitochondria in high-throughput studies"	6	23	21.283	1.26e-05
150	1	YMR318C ADH6 SGDID:S000004937_ Chr XIII from 912141-911059_ reverse complement_ Verified ORF_ "NADPH-dependent medium chain alcohol dehydrogenase with broad substrate specificity; member of the cinnamyl family of alcohol dehydrogenases; may be involved in fusel alcohol synthesis or in aldehyde tolerance"	6	17	21.477	0.000136
151	1	YOR120W GCY1 SGDID:S000005646_ Chr XV from 551115-552053_ Verified ORF_ "Putative NADP(+) coupled glycerol dehydrogenase_ proposed to be involved in an alternative pathway for glycerol catabolism; member of the aldo-keto reductase (AKR) family"	6	15	19.128	6.51e-06
152	1	YDR533C HSP31 SGDID:S000002941_ Chr IV from 1502153-1501440_ reverse complement_ Verified ORF_ "Possible chaperone and cysteine protease with similarity to E. coli Hsp31; member of the DJ-1/ThiJ/PfpI superfamily_ which includes human DJ-1 involved in Parkinson's disease; exists as a dimer and contains a putative metal-binding site"	6	46	23.008	2.79e-12
153	1	YCL049C YCL049C SGDID:S000000554_ Chr III from 40724-39786_ reverse complement_ Uncharacterized ORF_ "Protein of unknown function; localizes to membrane fraction; YCL049C is not an essential gene;"	5	26	17.286	0.000226
154	1	YGL027C CWH41 SGDID:S000002995_ Chr VII from 446148-443647_ reverse complement_ Verified ORF_ "Processing alpha glucosidase I_ ER type II integral membrane N-glycoprotein involved in assembly of cell wall beta 1_6 glucan and asparagine-linked protein glycosylation; also involved in ER protein quality control and sensing of ER stress"	5	9	15.843	5.55e-06
155	1	YDR342C HXT7 SGDID:S000002750_ Chr IV from 1155923-1154211_ reverse complement_ Verified ORF_ "High-affinity glucose transporter of the major facilitator superfamily_ nearly identical to Hxt6p_ expressed at high basal levels relative to other HXTs_ expression repressed by high glucose levels"	5	22	18.316	1.87e-06
155	2	YDR343C HXT6 SGDID:S000002751_ Chr IV from 1161315-1159603_ reverse complement_ Verified ORF_ "High-affinity glucose transporter of the major facilitator superfamily_ nearly identical to Hxt7p_ expressed at high basal levels relative to other HXTs_ repression of expression by high glucose requires SNF3"	4	21	15.224	1.87e-06
156	1	YBL076C ILS1 SGDID:S000000172_ Chr II from 84259-81041_ reverse complement_ Verified ORF_ "Cytoplasmic isoleucine-tRNA synthetase_ target of the G1-specific inhibitor reveromycin A"	5	11	17.933	0.000235
157	1	YLR414C YLR414C SGDID:S000004406_ Chr XII from 954141-953350_ reverse complement_ Uncharacterized ORF_ "Putative protein of unknown function; green fluorescent protein (GFP)-fusion protein localizes to the bud and cytoplasm; Hog1p is required for transcriptional induction in response to cell wall damage; YLR414C is not an essential gene"	5	42	19.663	4.59e-10
158	1	YBR015C MNN2 SGDID:S000000219_ Chr II from 269503-267710_ reverse complement_ Verified ORF_ "Alpha-1_2-mannosyltransferase_ responsible for addition of the first alpha-1_2-linked mannose to form the branches on the mannan backbone of oligosaccharides_ localizes to an early Golgi compartment"	5	13	16.707	1.39e-05
159	1	YJL186W MNN5 SGDID:S000003722_ Chr X from 80153-81913_ Verified ORF_ "Alpha-1_2-mannosyltransferase_ responsible for addition of the second alpha-1_2-linked mannose of the branches on the mannan backbone of oligosaccharides_ localizes to an early Golgi compartment"	5	8	14.537	5.49e-05
160	1	YBR078W ECM33 SGDID:S000000282_ Chr II from 393118-393175_393506-394854_ Verified ORF_ "GPI-anchored protein of unknown function_ has a possible role in apical bud growth; GPI-anchoring on the plasma membrane crucial to function; phosphorylated in mitochondria; similar to Sps2p and Pst1p"	5	64	17.59	3.16e-08
161	1	YDR261C EXG2 SGDID:S000002669_ Chr IV from 979206-977518_ reverse complement_ Verified ORF_ "Exo-1_3-beta-glucanase_ involved in cell wall beta-glucan assembly; may be anchored to the plasma membrane via a glycosylphosphatidylinositol (GPI) anchor"	5	11	16.067	2.89e-08
162	1	YHR057C CPR2 SGDID:S000001099_ Chr VIII from 218845-218228_ reverse complement_ Verified ORF_ "Peptidyl-prolyl cis-trans isomerase (cyclophilin)_ catalyzes the cis-trans isomerization of peptide bonds N-terminal to proline residues; has a potential role in the secretory pathway"	5	46	22.62	9.1e-08
163	1	YPL187W MF(ALPHA)1 SGDID:S000006108_ Chr XVI from 193647-194144_ Verified ORF_ "Mating pheromone alpha-factor_ made by alpha cells; interacts with mating type a cells to induce cell cycle arrest and other responses leading to mating; also encoded by MF(ALPHA)2_ although MF(ALPHA)1 produces most alpha-factor"	5	7	16.814	3.98e-08
164	1	YDL192W ARF1 SGDID:S000002351_ Chr IV from 116322-116867_ Verified ORF_ "ADP-ribosylation factor_ GTPase of the Ras superfamily involved in regulation of coated vesicle formation in intracellular trafficking within the Golgi; functionally interchangeable with Arf2p"	5	19	16.65	0.000161
164	2	YDL137W ARF2 SGDID:S000002296_ Chr IV from 216529-217074_ Verified ORF_ "ADP-ribosylation factor_ GTPase of the Ras superfamily involved in regulation of coated formation vesicles in intracellular trafficking within the Golgi; functionally interchangeable with Arf1p"	5	19	16.65	0.000161
165	1	YGL157W YGL157W SGDID:S000003125_ Chr VII from 209011-210054_ Verified ORF_ "Oxidoreductase_ catalyzes NADPH-dependent reduction of the bicyclic diketone bicyclo[2.2.2]octane-2_6-dione (BCO2_6D) to the chiral ketoalcohol (1R_4S_6S)-6-hydroxybicyclo[2.2.2]octane-2-one (BCO2one6ol)"	5	16	17.282	6.61e-06
166	1	YJR123W RPS5 SGDID:S000003884_ Chr X from 651892-652569_ Verified ORF_ "Protein component of the small (40S) ribosomal subunit_ the least basic of the non-acidic ribosomal proteins; phosphorylated in vivo; essential for viability; has similarity to E. coli S7 and rat S5 ribosomal proteins"	5	31	15.871	2.12e-05
167	1	YNR050C LYS9 SGDID:S000005333_ Chr XIV from 715390-714050_ reverse complement_ Verified ORF_ "Saccharopine dehydrogenase (NADP+_ L-glutamate-forming); catalyzes the formation of saccharopine from alpha-aminoadipate 6-semialdehyde_ which is the seventh step in lysine biosynthesis pathway"	5	19	17.616	1.07e-05
168	1	YBR162C TOS1 SGDID:S000000366_ Chr II from 564565-563198_ reverse complement_ Verified ORF_ "Covalently-bound cell wall protein of unknown function; identified as a cell cycle regulated SBF target gene; deletion mutants are highly resistant to treatment with beta-1_3-glucanase; has sequence similarity to YJL171C"	5	34	20.33	3.97e-05
169	1	YBR249C ARO4 SGDID:S000000453_ Chr II from 717989-716877_ reverse complement_ Verified ORF_ "3-deoxy-D-arabino-heptulosonate-7-phosphate (DAHP) synthase_ catalyzes the first step in aromatic amino acid biosynthesis and is feedback-inhibited by tyrosine or high concentrations of phenylalanine or tryptophan"	5	29	19.474	1.02e-05
170	1	YGL037C PNC1 SGDID:S000003005_ Chr VII from 427953-427303_ reverse complement_ Verified ORF_ "Nicotinamidase that converts nicotinamide to nicotinic acid as part of the NAD(+) salvage pathway_ required for life span extension by calorie restriction; PNC1 expression responds to all known stimuli that extend replicative life span"	5	12	19.215	1
171	1	YMR099C YMR099C SGDID:S000004705_ Chr XIII from 464826-463933_ reverse complement_ Verified ORF_ "Glucose-6-phosphate 1-epimerase (hexose-6-phosphate mutarotase)_ likely involved in carbohydrate metabolism; GFP-fusion protein localizes to both the nucleus and cytoplasm and is induced in response to the DNA-damaging agent MMS"	5	27	16.101	1.06e-06
172	1	YFL045C SEC53 SGDID:S000001849_ Chr VI from 44392-43628_ reverse complement_ Verified ORF_ "Phosphomannomutase_ involved in synthesis of GDP-mannose and dolichol-phosphate-mannose; required for folding and glycosylation of secretory proteins in the ER lumen"	5	16	13.438	1
173	1	YHR208W BAT1 SGDID:S000001251_ Chr VIII from 517532-518713_ Verified ORF_ "Mitochondrial branched-chain amino acid aminotransferase_ homolog of murine ECA39; highly expressed during logarithmic phase and repressed during stationary phase"	5	26	18.745	3.29e-10
174	1	YIL162W SUC2 SGDID:S000001424_ Chr IX from 37385-38983_ Verified ORF_ "Invertase_ sucrose hydrolyzing enzyme; a secreted_ glycosylated form is regulated by glucose repression_ and an intracellular_ nonglycosylated enzyme is produced constitutively"	5	11	19.3	0.000345
175	1	YPL160W CDC60 SGDID:S000006081_ Chr XVI from 246989-250261_ Verified ORF_ "Cytosolic leucyl tRNA synthetase_ ligates leucine to the appropriate tRNA"	5	7	14.167	4.3e-05
176	1	YGR043C YGR043C SGDID:S000003275_ Chr VII from 581440-580439_ reverse complement_ Uncharacterized ORF_ "Protein of unknown function; transcription is repressed by Mot1p and induced by alpha-factor and during diauxic shift; null mutant non-quiescent cells exhibit reduced reproductive capacity"	5	11	16.609	0.00013
177	1	YJR109C CPA2 SGDID:S000003870_ Chr X from 632932-629576_ reverse complement_ Verified ORF_ "Large subunit of carbamoyl phosphate synthetase_ which catalyzes a step in the synthesis of citrulline_ an arginine precursor"	4	6	13.601	5.25e-06
178	1	YLR270W DCS1 SGDID:S000004260_ Chr XII from 681188-682240_ Verified ORF_ "Non-essential hydrolase involved in mRNA decapping_ may function in a feedback mechanism to regulate deadenylation_ contains pyrophosphatase activity and a HIT (histidine triad) motif; interacts with neutral trehalase Nth1p"	4	11	12.455	0.000895
179	1	YHR203C RPS4B SGDID:S000001246_ Chr VIII from 505530-505517_505247-504476_ reverse complement_ Verified ORF_ "Protein component of the small (40S) ribosomal subunit; identical to Rps4Ap and has similarity to rat S4 ribosomal protein"	4	6	11.417	0.000962
179	2	YJR145C RPS4A SGDID:S000003906_ Chr X from 703059-703046_702789-702018_ reverse complement_ Verified ORF_ "Protein component of the small (40S) ribosomal subunit; mutation affects 20S pre-rRNA processing; identical to Rps4Bp and has similarity to rat S4 ribosomal protein"	4	6	11.417	0.000962
180	1	YDL046W NPC2 SGDID:S000002204_ Chr IV from 371237-371758_ Verified ORF_ "Functional homolog of human NPC2/He1_ which is a cholesterol-binding protein whose deficiency causes Niemann-Pick type C2 disease involving retention of cholesterol in lysosomes"	4	195	17.44	6e-08
181	1	YEL034W HYP2 SGDID:S000000760_ Chr V from 85676-86149_ Verified ORF_ "Translation initiation factor eIF-5A_ promotes formation of the first peptide bond; similar to and functionally redundant with Anb1p; possible role in translation elongation; undergoes an essential hypusination modification"	4	13	15.211	6.56e-06
182	1	YJR104C SOD1 SGDID:S000003865_ Chr X from 623003-622539_ reverse complement_ Verified ORF_ "Cytosolic superoxide dismutase; some mutations are analogous to those that cause ALS (amyotrophic lateral sclerosis) in humans"	4	35	16.32	0.000279
183	1	YMR323W ERR3 SGDID:S000004942_ Chr XIII from 920086-921399_ Verified ORF_ "Protein of unknown function_ has similarity to enolases"	4	6	12.382	9.14e-07
183	2	YPL281C ERR2 SGDID:S000006202_ Chr XVI from 10870-9557_ reverse complement_ Verified ORF_ "Protein of unknown function_ has similarity to enolases"	4	6	12.382	9.14e-07
183	3	YOR393W ERR1 SGDID:S000005920_ Chr XV from 1080274-1081587_ Verified ORF_ "Protein of unknown function_ has similarity to enolases"	4	6	12.382	9.14e-07
184	1	YKL103C LAP4 SGDID:S000001586_ Chr XI from 247326-245782_ reverse complement_ Verified ORF_ "Vacuolar aminopeptidase_ often used as a marker protein in studies of autophagy and cytosol to vacuole targeting (CVT) pathway"	4	6	11.98	1.39e-11
185	1	YFL048C EMP47 SGDID:S000001846_ Chr VI from 40180-38843_ reverse complement_ Verified ORF_ "Integral membrane component of endoplasmic reticulum-derived COPII-coated vesicles_ which function in ER to Golgi transport"	4	13	11.991	4.47e-06
186	1	YPL061W ALD6 SGDID:S000005982_ Chr XVI from 432585-434087_ Verified ORF_ "Cytosolic aldehyde dehydrogenase_ activated by Mg2+ and utilizes NADP+ as the preferred coenzyme; required for conversion of acetaldehyde to acetate; constitutively expressed; locates to the mitochondrial outer surface upon oxidative stress"	4	8	16.193	0.000153
187	1	YIR038C GTT1 SGDID:S000001477_ Chr IX from 424510-423806_ reverse complement_ Verified ORF_ "ER associated glutathione S-transferase capable of homodimerization; expression induced during the diauxic shift and throughout stationary phase; functional overlap with Gtt2p_ Grx1p_ and Grx2p"	4	4	12.062	1.3e-05
188	1	YCL035C GRX1 SGDID:S000000540_ Chr III from 61173-60841_ reverse complement_ Verified ORF_ "Hydroperoxide and superoxide-radical responsive heat-stable glutathione-dependent disulfide oxidoreductase with active site cysteine pair; protects cells from oxidative damage"	4	6	11.686	0.000238
189	1	YFR018C YFR018C SGDID:S000001914_ Chr VI from 184210-183119_ reverse complement_ Uncharacterized ORF_ "Putative protein of unknown function"	4	11	12.459	0.000364
190	1	YFL038C YPT1 SGDID:S000001856_ Chr VI from 55985-55365_ reverse complement_ Verified ORF_ "Ras-like small GTPase_ involved in the ER-to-Golgi step of the secretory pathway; complex formation with the Rab escort protein Mrs6p is required for prenylation of Ypt1p by protein geranylgeranyltransferase type II (Bet2p-Bet4p)"	4	4	11.565	0.000495
191	1	YNL178W RPS3 SGDID:S000005122_ Chr XIV from 302682-303404_ Verified ORF_ "Protein component of the small (40S) ribosomal subunit_ has apurinic/apyrimidinic (AP) endonuclease activity; essential for viability; has similarity to E. coli S3 and rat S3 ribosomal proteins"	4	11	14.145	1.04e-06
192	1	YJL034W KAR2 SGDID:S000003571_ Chr X from 381322-383370_ Verified ORF_ "ATPase involved in protein import into the ER_ also acts as a chaperone to mediate protein folding in the ER and may play a role in ER export of soluble proteins; regulates the unfolded protein response via interaction with Ire1p"	4	16	15.193	6.1e-12
193	1	YDR454C GUK1 SGDID:S000002862_ Chr IV from 1366820-1366257_ reverse complement_ Verified ORF_ "Guanylate kinase_ converts GMP to GDP; required for growth and mannose outer chain elongation of cell wall N-linked glycoproteins"	4	7	9.455	1
194	1	YBR127C VMA2 SGDID:S000000331_ Chr II from 492816-491263_ reverse complement_ Verified ORF_ "Subunit B of the eight-subunit V1 peripheral membrane domain of the vacuolar H+-ATPase (V-ATPase)_ an electrogenic proton pump found throughout the endomembrane system; contains nucleotide binding sites; also detected in the cytoplasm"	4	5	10.621	0.000462
195	1	YJR069C HAM1 SGDID:S000003830_ Chr X from 569392-568799_ reverse complement_ Verified ORF_ "Conserved protein with deoxyribonucleoside triphosphate pyrophosphohydrolase activity_ mediates exclusion of noncanonical purines from deoxyribonucleoside triphosphate pools; mutant is sensitive to the base analog 6-N-hydroxylaminopurine"	4	5	12.434	7.1e-05
196	1	YNR043W MVD1 SGDID:S000005326_ Chr XIV from 701897-703087_ Verified ORF_ "Mevalonate pyrophosphate decarboxylase_ essential enzyme involved in the biosynthesis of isoprenoids and sterols_ including ergosterol; acts as a homodimer"	4	7	17.917	6.75e-12
197	1	YDL174C DLD1 SGDID:S000002333_ Chr IV from 147590-145827_ reverse complement_ Verified ORF_ "D-lactate dehydrogenase_ oxidizes D-lactate to pyruvate_ transcription is heme-dependent_ repressed by glucose_ and derepressed in ethanol or lactate; located in the mitochondrial inner membrane"	4	16	13.476	0.000353
198	1	YLR340W RPP0 SGDID:S000004332_ Chr XII from 805887-806825_ Verified ORF_ "Conserved ribosomal protein P0 similar to rat P0_ human P0_ and E. coli L10e; shown to be phosphorylated on serine 302"	4	22	12.352	1.36e-05
199	1	YOL030W GAS5 SGDID:S000005390_ Chr XV from 268188-269642_ Verified ORF_ "1_3-beta-glucanosyltransferase_ has similarity to Gas1p; localizes to the cell wall"	4	19	15.932	1.27e-05
200	1	YLR180W SAM1 SGDID:S000004170_ Chr XII from 515264-516412_ Verified ORF_ "S-adenosylmethionine synthetase_ catalyzes transfer of the adenosyl group of ATP to the sulfur atom of methionine; one of two differentially regulated isozymes (Sam1p and Sam2p)"	4	24	13.727	0.000244
201	1	YAR015W ADE1 SGDID:S000000070_ Chr I from 169370-170290_ Verified ORF_ "N-succinyl-5-aminoimidazole-4-carboxamide ribotide (SAICAR) synthetase_ required for 'de novo' purine nucleotide biosynthesis; red pigment accumulates in mutant cells deprived of adenine"	4	19	14.391	8.4e-06
202	1	YML106W URA5 SGDID:S000004574_ Chr XIII from 56773-57453_ Verified ORF_ "Major orotate phosphoribosyltransferase (OPRTase) isozyme that catalyzes the fifth enzymatic step in de novo biosynthesis of pyrimidines_ converting orotate into orotidine-5'-phosphate; minor OPRTase encoded by URA10"	4	10	11.929	0.00067
203	1	YLL045C RPL8B SGDID:S000003968_ Chr XII from 48628-47858_ reverse complement_ Verified ORF_ "Ribosomal protein L4 of the large (60S) ribosomal subunit_ nearly identical to Rpl8Ap and has similarity to rat L7a ribosomal protein; mutation results in decreased amounts of free 60S subunits"	4	10	11.616	4.91e-05
204	1	YDL126C CDC48 SGDID:S000002284_ Chr IV from 238664-236157_ reverse complement_ Verified ORF_ "ATPase in ER_ nuclear membrane and cytosol with homology to mammalian p97; in a complex with Npl4p and Ufd1p participates in retrotranslocation of ubiquitinated proteins from the ER into the cytosol for degradation by the proteasome"	4	5	11.974	2.06e-05
205	1	YDR418W RPL12B SGDID:S000002826_ Chr IV from 1301609-1302106_ Verified ORF_ "Protein component of the large (60S) ribosomal subunit_ nearly identical to Rpl12Ap; rpl12a rpl12b double mutant exhibits slow growth and slow translation; has similarity to E. coli L11 and rat L12 ribosomal proteins"	4	15	14.062	1.91e-07
205	2	YEL054C RPL12A SGDID:S000000780_ Chr V from 53218-52721_ reverse complement_ Verified ORF_ "Protein component of the large (60S) ribosomal subunit_ nearly identical to Rpl12Bp; rpl12a rpl12b double mutant exhibits slow growth and slow translation; has similarity to E. coli L11 and rat L12 ribosomal proteins"	4	15	14.062	1.91e-07
206	1	YDR382W RPP2B SGDID:S000002790_ Chr IV from 1239485-1239817_ Verified ORF_ "Ribosomal protein P2 beta_ a component of the ribosomal stalk_ which is involved in the interaction between translational elongation factors and the ribosome; regulates the accumulation of P1 (Rpp1Ap and Rpp1Bp) in the cytoplasm"	4	23	15.845	1.76e-05
207	1	YDL185W TFP1 SGDID:S000002344_ Chr IV from 126788-130003_ Verified ORF_ "Vacuolar ATPase V1 domain subunit A containing the catalytic nucleotide binding sites; protein precursor undergoes self-catalyzed splicing to yield the extein Tfp1p and the intein Vde (PI-SceI)_ which is a site-specific endonuclease"	4	15	14.073	1.39e-05
208	1	YDL125C HNT1 SGDID:S000002283_ Chr IV from 239606-239510_239398-239019_ reverse complement_ Verified ORF_ "Adenosine 5'-monophosphoramidase; interacts physically and genetically with Kin28p_ a CDK and TFIIK subunit_ and genetically with CAK1; member of the histidine triad (HIT) superfamily of nucleotide-binding proteins and similar to Hint"	4	26	14.767	3.81e-06
209	1	YJR148W BAT2 SGDID:S000003909_ Chr X from 705735-706865_ Verified ORF_ "Cytosolic branched-chain amino acid aminotransferase_ homolog of murine ECA39; highly expressed during stationary phase and repressed during logarithmic phase"	4	36	16.388	2.69e-09
210	1	YEL024W RIP1 SGDID:S000000750_ Chr V from 107260-107907_ Verified ORF_ "Ubiquinol-cytochrome-c reductase_ a Rieske iron-sulfur protein of the mitochondrial cytochrome bc1 complex; transfers electrons from ubiquinol to cytochrome c1 during respiration"	4	8	13.525	0.000666
211	1	YPL028W ERG10 SGDID:S000005949_ Chr XVI from 498094-499290_ Verified ORF_ "Acetyl-CoA C-acetyltransferase (acetoacetyl-CoA thiolase)_ cytosolic enzyme that transfers an acetyl group from one acetyl-CoA molecule to another_ forming acetoacetyl-CoA; involved in the first step in mevalonate biosynthesis"	4	11	13.288	0.000532
212	1	YBR031W RPL4A SGDID:S000000235_ Chr II from 300166-301254_ Verified ORF_ "N-terminally acetylated protein component of the large (60S) ribosomal subunit_ nearly identical to Rpl4Bp and has similarity to E. coli L4 and rat L4 ribosomal proteins"	4	19	13.541	0.000101
212	2	YDR012W RPL4B SGDID:S000002419_ Chr IV from 471851-472939_ Verified ORF_ "Protein component of the large (60S) ribosomal subunit_ nearly identical to Rpl4Ap and has similarity to E. coli L4 and rat L4 ribosomal proteins"	4	19	13.541	0.000101
213	1	YDR353W TRR1 SGDID:S000002761_ Chr IV from 1183293-1184252_ Verified ORF_ "Cytoplasmic thioredoxin reductase_ key regulatory enzyme that determines the redox state of the thioredoxin system_ which acts as a disulfide reductase system and protects cells against both oxidative and reductive stress"	4	14	17.118	4.31e-07
214	1	YEL021W URA3 SGDID:S000000747_ Chr V from 116167-116970_ Verified ORF_ "Orotidine-5'-phosphate (OMP) decarboxylase_ catalyzes the sixth enzymatic step in the de novo biosynthesis of pyrimidines_ converting OMP into uridine monophosphate (UMP); converts 5-FOA into 5-fluorouracil_ a toxic compound"	4	7	12.518	0.000198
215	1	YJR045C SSC1 SGDID:S000003806_ Chr X from 521595-519631_ reverse complement_ Verified ORF_ "Mitochondrial matrix ATPase_ subunit of the presequence translocase-associated protein import motor (PAM) and of SceI endonuclease; involved in protein folding and translocation into the matrix; phosphorylated; member of HSP70 family"	4	11	11.771	0.000486
216	1	YLL018C DPS1 SGDID:S000003941_ Chr XII from 111574-109901_ reverse complement_ Verified ORF_ "Cytoplasmic aspartyl-tRNA synthetase_ homodimeric enzyme that catalyzes the specific aspartylation of tRNA(Asp); class II aminoacyl tRNA synthetase; binding to its own mRNA may confer autoregulation"	4	14	15.261	7.77e-05
217	1	YMR008C PLB1 SGDID:S000004610_ Chr XIII from 282584-280590_ reverse complement_ Verified ORF_ "Phospholipase B (lysophospholipase) involved in lipid metabolism_ required for deacylation of phosphatidylcholine and phosphatidylethanolamine but not phosphatidylinositol"	4	11	13.078	6.57e-05
218	1	YLR259C HSP60 SGDID:S000004249_ Chr XII from 665004-663286_ reverse complement_ Verified ORF_ "Tetradecameric mitochondrial chaperonin required for ATP-dependent folding of precursor polypeptides and complex assembly; prevents aggregation and mediates protein refolding after heat shock; role in mtDNA transmission; phosphorylated"	4	4	10.89	0.000562
219	1	YLR028C ADE16 SGDID:S000004018_ Chr XII from 201316-199541_ reverse complement_ Verified ORF_ "Enzyme of 'de novo' purine biosynthesis containing both 5-aminoimidazole-4-carboxamide ribonucleotide transformylase and inosine monophosphate cyclohydrolase activities_ isozyme of Ade17p; ade16 ade17 mutants require adenine and histidine"	4	8	14.301	3.19e-05
220	1	YER136W GDI1 SGDID:S000000938_ Chr V from 439612-440967_ Verified ORF_ "GDP dissociation inhibitor_ regulates vesicle traffic in secretory pathways by regulating the dissociation of GDP from the Sec4/Ypt/rab family of GTP binding proteins"	4	9	10.449	6.27e-05
221	1	YDR071C PAA1 SGDID:S000002478_ Chr IV from 589401-588826_ reverse complement_ Verified ORF_ "Polyamine acetyltransferase; acetylates polyamines (e.g. putrescine_ spermidine_ spermine) and also aralkylamines (e.g. tryptamine_ phenylethylamine); may be involved in transcription and/or DNA replication"	4	8	10.33	2.91e-05
222	1	YNL135C FPR1 SGDID:S000005079_ Chr XIV from 372228-371884_ reverse complement_ Verified ORF_ "Peptidyl-prolyl cis-trans isomerase (PPIase)_ binds to the drugs FK506 and rapamycin; also binds to the nonhistone chromatin binding protein Hmo1p and may regulate its assembly or function"	4	13	11.518	0.000789
223	1	YBR092C PHO3 SGDID:S000000296_ Chr II from 429095-427692_ reverse complement_ Verified ORF_ "Constitutively expressed acid phosphatase similar to Pho5p; brought to the cell surface by transport vesicles; hydrolyzes thiamin phosphates in the periplasmic space_ increasing cellular thiamin uptake; expression is repressed by thiamin"	4	39	18.539	7.69e-10
224	1	YBR286W APE3 SGDID:S000000490_ Chr II from 774696-776309_ Verified ORF_ "Vacuolar aminopeptidase Y_ processed to mature form by Prb1p"	4	16	13.113	2.86e-06
225	1	YPR016C TIF6 SGDID:S000006220_ Chr XVI from 593066-592329_ reverse complement_ Verified ORF_ "Constituent of 66S pre-ribosomal particles_ has similarity to human translation initiation factor 6 (eIF6); may be involved in the biogenesis and or stability of 60S ribosomal subunits"	3	4	8.247	0.000378
226	1	YGR189C CRH1 SGDID:S000003421_ Chr VII from 878197-876674_ reverse complement_ Verified ORF_ "Putative chitin transglycosidase_ cell wall protein that functions in the transfer of chitin to beta(1-6)glucan; localizes to sites of polarized growth; expression is induced under cell wall stress conditions"	3	10	8.686	0.000104
227	1	YGL123W RPS2 SGDID:S000003091_ Chr VII from 277623-278387_ Verified ORF_ "Protein component of the small (40S) subunit_ essential for control of translational accuracy; has similarity to E. coli S5 and rat S2 ribosomal proteins"	3	9	9.859	1.17e-05
228	1	YDL010W GRX6 SGDID:S000002168_ Chr IV from 432328-433023_ Verified ORF_ "Cis-golgi localized monothiol glutaredoxin that binds an iron-sulfur cluster; more similar in activity to dithiol than other monothiol glutaredoxins; involved in the oxidative stress response; functional overlap with GRX6"	3	10	10.416	0.000177
229	1	YDR055W PST1 SGDID:S000002462_ Chr IV from 563526-564860_ Verified ORF_ "Cell wall protein that contains a putative GPI-attachment site; secreted by regenerating protoplasts; up-regulated by activation of the cell integrity pathway_ as mediated by Rlm1p; upregulated by cell wall damage via disruption of FKS1"	3	47	14.443	1.89e-09
230	1	YBR121C GRS1 SGDID:S000000325_ Chr II from 483361-481358_ reverse complement_ Verified ORF_ "Cytoplasmic and mitochondrial glycyl-tRNA synthase that ligates glycine to the cognate anticodon bearing tRNA; transcription termination factor that may interact with the 3'-end of pre-mRNA to promote 3'-end formation"	3	4	8.107	0.000632
231	1	YPL090C RPS6A SGDID:S000006011_ Chr XVI from 378392-378387_377992-377288_ reverse complement_ Verified ORF_ "Protein component of the small (40S) ribosomal subunit; identical to Rps6Bp and has similarity to rat S6 ribosomal protein"	3	7	8.72	1.45e-08
231	2	YBR181C RPS6B SGDID:S000000385_ Chr II from 592769-592764_592411-591707_ reverse complement_ Verified ORF_ "Protein component of the small (40S) ribosomal subunit; identical to Rps6Ap and has similarity to rat S6 ribosomal protein"	3	7	8.72	1.45e-08
232	1	YLR351C NIT3 SGDID:S000004343_ Chr XII from 830363-829488_ reverse complement_ Verified ORF_ "Nit protein_ one of two proteins in S. cerevisiae with similarity to the Nit domain of NitFhit from fly and worm and to the mouse and human Nit protein which interacts with the Fhit tumor suppressor; nitrilase superfamily member"	3	5	9.706	2.67e-05
233	1	YIL069C RPS24B SGDID:S000001331_ Chr IX from 232366-232364_231954-231550_ reverse complement_ Verified ORF_ "Protein component of the small (40S) ribosomal subunit; identical to Rps24Ap and has similarity to rat S24 ribosomal protein"	3	6	9.037	1.69e-07
233	2	YER074W RPS24A SGDID:S000000876_ Chr V from 306319-306321_306788-307192_ Verified ORF_ "Protein component of the small (40S) ribosomal subunit; identical to Rps24Bp and has similarity to rat S24 ribosomal protein"	3	6	9.037	1.69e-07
234	1	YBR248C HIS7 SGDID:S000000452_ Chr II from 716460-714802_ reverse complement_ Verified ORF_ "Imidazole glycerol phosphate synthase (glutamine amidotransferase:cyclase)_ catalyzes the fifth and sixth steps of histidine biosynthesis and also produces 5-aminoimidazole-4-carboxamide ribotide (AICAR)_ a purine precursor"	3	13	9.387	1.9e-07
235	1	YIR031C DAL7 SGDID:S000001470_ Chr IX from 414676-413012_ reverse complement_ Verified ORF_ "Malate synthase_ role in allantoin degradation unknown; expression sensitive to nitrogen catabolite repression and induced by allophanate_ an intermediate in allantoin degradation"	3	4	7.763	1.07e-05
236	1	YHR068W DYS1 SGDID:S000001110_ Chr VIII from 232135-233298_ Verified ORF_ "Deoxyhypusine synthase_ catalyzes formation of deoxyhypusine_ the first step in hypusine biosynthesis; triggers posttranslational hypusination of translation elongation factor eIF-5A and regulates its intracellular levels; tetrameric"	3	4	7.396	0.000183
237	1	YIL051C MMF1 SGDID:S000001313_ Chr IX from 258279-257842_ reverse complement_ Verified ORF_ "Mitochondrial protein involved in maintenance of the mitochondrial genome"	3	6	11.98	8.98e-06
238	1	YBR169C SSE2 SGDID:S000000373_ Chr II from 575991-573910_ reverse complement_ Verified ORF_ "Member of the heat shock protein 70 (HSP70) family; may be involved in protein folding; localized to the cytoplasm; highly homologous to the heat shock protein Sse1p"	3	13	8.868	7.6e-06
239	1	YAL053W FLC2 SGDID:S000000049_ Chr I from 45900-48251_ Verified ORF_ "Putative FAD transporter; required for uptake of FAD into endoplasmic reticulum; involved in cell wall maintenance"	3	7	9.882	1.45e-06
240	1	YJL121C RPE1 SGDID:S000003657_ Chr X from 191089-190373_ reverse complement_ Verified ORF_ "D-ribulose-5-phosphate 3-epimerase_ catalyzes a reaction in the non-oxidative part of the pentose-phosphate pathway; mutants are sensitive to oxidative stress"	3	5	9.403	0.00034
241	1	YHR047C AAP1 SGDID:S000001089_ Chr VIII from 201303-198733_ reverse complement_ Verified ORF_ "Arginine/alanine aminopeptidase_ overproduction stimulates glycogen accumulation"	3	6	9.116	7.07e-05
242	1	YGR201C YGR201C SGDID:S000003433_ Chr VII from 903202-902525_ reverse complement_ Uncharacterized ORF_ "Putative protein of unknown function"	3	7	10.206	3.18e-06
243	1	YNL274C GOR1 SGDID:S000005218_ Chr XIV from 122170-121118_ reverse complement_ Verified ORF_ "Glyoxylate reductase; null mutation results in increased biomass after diauxic shift; the authentic_ non-tagged protein is detected in highly purified mitochondria in high-throughput studies"	3	4	10.028	4.3e-06
244	1	YOL039W RPP2A SGDID:S000005399_ Chr XV from 254296-254616_ Verified ORF_ "Ribosomal protein P2 alpha_ a component of the ribosomal stalk_ which is involved in the interaction between translational elongation factors and the ribosome; regulates the accumulation of P1 (Rpp1Ap and Rpp1Bp) in the cytoplasm"	3	6	10.685	1.91e-06
245	1	YER110C KAP123 SGDID:S000000912_ Chr V from 382099-378758_ reverse complement_ Verified ORF_ "Karyopherin beta_ mediates nuclear import of ribosomal proteins prior to assembly into ribosomes and import of histones H3 and H4; localizes to the nuclear pore_ nucleus_ and cytoplasm; exhibits genetic interactions with RAI1"	3	7	10.697	0.000641
246	1	YCL040W GLK1 SGDID:S000000545_ Chr III from 50838-52340_ Verified ORF_ "Glucokinase_ catalyzes the phosphorylation of glucose at C6 in the first irreversible step of glucose metabolism; one of three glucose phosphorylating enzymes; expression regulated by non-fermentable carbon sources"	3	7	10.707	0.000947
247	1	YPL117C IDI1 SGDID:S000006038_ Chr XVI from 328729-327863_ reverse complement_ Verified ORF_ "Isopentenyl diphosphate:dimethylallyl diphosphate isomerase (IPP isomerase)_ catalyzes an essential activation step in the isoprenoid biosynthetic pathway; required for viability"	3	5	8.065	3.25e-07
248	1	YGR185C TYS1 SGDID:S000003417_ Chr VII from 867525-866341_ reverse complement_ Verified ORF_ "Cytoplasmic tyrosyl-tRNA synthetase_ class I aminoacyl-tRNA synthetase that aminoacylates tRNA(Tyr)_ required for cytoplasmic protein synthesis_ interacts with positions 34 and 35 of the anticodon of tRNATyr"	3	3	8.28	3.77e-08
249	1	YLR250W SSP120 SGDID:S000004240_ Chr XII from 640319-641023_ Verified ORF_ "Protein of unknown function; green fluorescent protein (GFP)-fusion protein localizes to the cytoplasm in a punctate pattern"	3	11	10.709	2.2e-05
250	1	YGL009C LEU1 SGDID:S000002977_ Chr VII from 478657-476318_ reverse complement_ Verified ORF_ "Isopropylmalate isomerase_ catalyzes the second step in the leucine biosynthesis pathway"	3	7	8.235	2.64e-05
251	1	YHR139C SPS100 SGDID:S000001181_ Chr VIII from 379202-378222_ reverse complement_ Verified ORF_ "Protein required for spore wall maturation; expressed during sporulation; may be a component of the spore wall"	3	26	15.684	1.03e-12
252	1	YBR109C CMD1 SGDID:S000000313_ Chr II from 458356-457913_ reverse complement_ Verified ORF_ "Calmodulin; Ca++ binding protein that regulates Ca++ independent processes (mitosis_ bud growth_ actin organization_ endocytosis_ etc.) and Ca++ dependent processes (stress-activated pathways)_ targets include Nuf1p_ Myo2p and calcineurin"	3	13	9.567	8.95e-07
253	1	YFL005W SEC4 SGDID:S000001889_ Chr VI from 130329-130976_ Verified ORF_ "Secretory vesicle-associated Rab GTPase essential for exocytosis; associates with the exocyst component Sec15p and may regulate polarized delivery of transport vesicles to the exocyst at the plasma membrane"	3	5	7.799	1.26e-05
254	1	YKL056C TMA19 SGDID:S000001539_ Chr XI from 334559-334056_ reverse complement_ Verified ORF_ "Protein that associates with ribosomes; homolog of translationally controlled tumor protein; green fluorescent protein (GFP)-fusion protein localizes to the cytoplasm and relocates to the mitochondrial outer surface upon oxidative stress"	3	29	11.793	3.06e-10
255	1	YLR075W RPL10 SGDID:S000004065_ Chr XII from 282928-283593_ Verified ORF_ "Protein component of the large (60S) ribosomal subunit_ responsible for joining the 40S and 60S subunits; regulates translation initiation; has similarity to rat L10 ribosomal protein and to members of the QM gene family"	3	17	13.376	7.77e-12
256	1	YOR185C GSP2 SGDID:S000005711_ Chr XV from 682107-681445_ reverse complement_ Verified ORF_ "GTP binding protein (mammalian Ranp homolog) involved in the maintenance of nuclear organization_ RNA processing and transport; interacts with Kap121p_ Kap123p and Pdr6p (karyophilin betas); Gsp1p homolog that is not required for viability"	3	42	10.762	2.95e-07
256	2	YLR293C GSP1 SGDID:S000004284_ Chr XII from 721432-720773_ reverse complement_ Verified ORF_ "GTP binding protein (mammalian Ranp homolog) involved in the maintenance of nuclear organization_ RNA processing and transport; regulated by Prp20p_ Rna1p_ Yrb1p_ Yrb2p_ Yrp4p_ Yrb30p_ Cse1p and Kap95p; yeast Gsp2p homolog"	3	42	10.762	2.95e-07
257	1	YOL019W YOL019W SGDID:S000005379_ Chr XV from 288899-290554_ Uncharacterized ORF_ "Protein of unknown function; green fluorescent protein (GFP)-fusion protein localizes to the cell periphery and vacuole"	3	3	9.752	3.18e-06
258	1	YER062C HOR2 SGDID:S000000864_ Chr V from 280680-279928_ reverse complement_ Verified ORF_ "One of two redundant DL-glycerol-3-phosphatases (RHR2/GPP1 encodes the other) involved in glycerol biosynthesis; induced in response to hyperosmotic stress and oxidative stress_ and during the diauxic transition"	3	28	9.791	1.71e-07
259	1	YPR033C HTS1 SGDID:S000006237_ Chr XVI from 639016-637376_ reverse complement_ Verified ORF_ "Cytoplasmic and mitochondrial histidine tRNA synthetase; encoded by a single nuclear gene that specifies two messages; efficient mitochondrial localization requires both a presequence and an amino-terminal sequence"	3	4	9.171	0.000356
260	1	YML022W APT1 SGDID:S000004484_ Chr XIII from 228937-229500_ Verified ORF_ "Adenine phosphoribosyltransferase_ catalyzes the formation of AMP from adenine and 5-phosphoribosylpyrophosphate; involved in the salvage pathway of purine nucleotide biosynthesis"	3	6	9.112	0.000551
261	1	YPL131W RPL5 SGDID:S000006052_ Chr XVI from 303120-304013_ Verified ORF_ "Protein component of the large (60S) ribosomal subunit with similarity to E. coli L18 and rat L5 ribosomal proteins; binds 5S rRNA and is required for 60S subunit assembly"	3	21	11.908	2.19e-06
262	1	YLL050C COF1 SGDID:S000003973_ Chr XII from 40413-40400_40220-39803_ reverse complement_ Verified ORF_ "Cofilin_ promotes actin filament depolarization in a pH-dependent manner; binds both actin monomers and filaments and severs filaments; thought to be regulated by phosphorylation at SER4; ubiquitous and essential in eukaryotes"	3	23	12.87	9.68e-11
263	1	YGR088W CTT1 SGDID:S000003320_ Chr VII from 654638-656326_ Verified ORF_ "Cytosolic catalase T_ has a role in protection from oxidative damage by hydrogen peroxide"	3	3	9.467	9.39e-06
264	1	YJR070C LIA1 SGDID:S000003831_ Chr X from 570591-569614_ reverse complement_ Verified ORF_ "Deoxyhypusine hydroxylase_ a HEAT-repeat containing metalloenzyme that catalyses hypusine formation; binds to and is required for the modification of Hyp2p (eIF5A); complements S. pombe mmd1 mutants defective in mitochondrial positioning"	3	6	9.542	5.77e-07
265	1	YMR315W YMR315W SGDID:S000004932_ Chr XIII from 902799-903848_ Uncharacterized ORF_ "Putative protein of unknown function; green fluorescent protein (GFP)-fusion protein localizes to the cytoplasm and nucleus; YMR315W is not an essential gene"	3	4	8.866	1
266	1	YHL033C RPL8A SGDID:S000001025_ Chr VIII from 36023-35253_ reverse complement_ Verified ORF_ "Ribosomal protein L4 of the large (60S) ribosomal subunit_ nearly identical to Rpl8Bp and has similarity to rat L7a ribosomal protein; mutation results in decreased amounts of free 60S subunits"	3	9	8.249	4.91e-05
267	1	YBL099W ATP1 SGDID:S000000195_ Chr II from 37050-38687_ Verified ORF_ "Alpha subunit of the F1 sector of mitochondrial F1F0 ATP synthase_ which is a large_ evolutionarily conserved enzyme complex required for ATP synthesis; phosphorylated"	3	13	10.62	1.47e-06
268	1	YHR025W THR1 SGDID:S000001067_ Chr VIII from 159431-160504_ Verified ORF_ "Homoserine kinase_ conserved protein required for threonine biosynthesis; expression is regulated by the GCN4-mediated general amino acid control pathway"	3	12	9.254	1.31e-05
269	1	YOL058W ARG1 SGDID:S000005419_ Chr XV from 219210-220472_ Verified ORF_ "Arginosuccinate synthetase_ catalyzes the formation of L-argininosuccinate from citrulline and L-aspartate in the arginine biosynthesis pathway; potential Cdc28p substrate"	3	9	8.874	1.01e-05
270	1	YNL327W EGT2 SGDID:S000005271_ Chr XIV from 24047-27172_ Verified ORF_ "Glycosylphosphatidylinositol (GPI)-anchored cell wall endoglucanase required for proper cell separation after cytokinesis_ expression is activated by Swi5p and tightly regulated in a cell cycle-dependent manner"	3	18	14.356	7.02e-08
271	1	YIL015W BAR1 SGDID:S000001277_ Chr IX from 322340-324103_ Verified ORF_ "Aspartyl protease secreted into the periplasmic space of mating type a cells_ helps cells find mating partners_ cleaves and inactivates alpha factor allowing cells to recover from alpha-factor-induced cell cycle arrest"	3	18	12.07	2.44e-08
272	1	YGL030W RPL30 SGDID:S000002998_ Chr VII from 439096-439098_439329-439643_ Verified ORF_ "Protein component of the large (60S) ribosomal subunit_ has similarity to rat L30 ribosomal protein; involved in pre-rRNA processing in the nucleolus; autoregulates splicing of its transcript"	3	17	11.765	2.29e-08
273	1	YOL143C RIB4 SGDID:S000005503_ Chr XV from 55103-54594_ reverse complement_ Verified ORF_ "Lumazine synthase (6_7-dimethyl-8-ribityllumazine synthase_ also known as DMRL synthase); catalyzes synthesis of immediate precursor to riboflavin"	3	7	9.941	3.56e-07
274	1	YMR083W ADH3 SGDID:S000004688_ Chr XIII from 434787-435914_ Verified ORF_ "Mitochondrial alcohol dehydrogenase isozyme III; involved in the shuttling of mitochondrial NADH to the cytosol under anaerobic conditions and ethanol production"	3	32	10.792	5.11e-14
275	1	YEL060C PRB1 SGDID:S000000786_ Chr V from 41953-40046_ reverse complement_ Verified ORF_ "Vacuolar proteinase B (yscB)_ a serine protease of the subtilisin family; involved in protein degradation in the vacuole and required for full protein degradation during sporulation"	3	11	11.871	6.16e-08
276	1	YDR144C MKC7 SGDID:S000002551_ Chr IV from 746099-744309_ reverse complement_ Verified ORF_ "GPI-anchored aspartyl protease (yapsin) involved in protein processing; shares functions with Yap3p and Kex2p"	2	6	6.362	0.00022
277	1	YNL307C MCK1 SGDID:S000005251_ Chr XIV from 57573-56446_ reverse complement_ Verified ORF_ "Protein serine/threonine/tyrosine (dual-specificity) kinase involved in control of chromosome segregation and in regulating entry into meiosis; related to mammalian glycogen synthase kinases of the GSK-3 family"	2	3	6.086	1.75e-09
278	1	YBR117C TKL2 SGDID:S000000321_ Chr II from 476431-474386_ reverse complement_ Verified ORF_ "Transketolase_ similar to Tkl1p; catalyzes conversion of xylulose-5-phosphate and ribose-5-phosphate to sedoheptulose-7-phosphate and glyceraldehyde-3-phosphate in the pentose phosphate pathway; needed for synthesis of aromatic amino acids"	2	3	6.334	0.000363
279	1	YMR250W GAD1 SGDID:S000004862_ Chr XIII from 770800-772557_ Verified ORF_ "Glutamate decarboxylase_ converts glutamate into gamma-aminobutyric acid (GABA) during glutamate catabolism; involved in response to oxidative stress"	2	2	4.355	2.16e-05
280	1	YGR106C YGR106C SGDID:S000003338_ Chr VII from 699790-698993_ reverse complement_ Uncharacterized ORF_ "Putative protein of unknown function; green fluorescent protein (GFP)-fusion protein localizes to the vacuolar memebrane"	2	7	8.145	0.000162
281	1	YDL083C RPS16B SGDID:S000002241_ Chr IV from 307789-307766_307333-306926_ reverse complement_ Verified ORF_ "Protein component of the small (40S) ribosomal subunit; identical to Rps16Ap and has similarity to E. coli S9 and rat S16 ribosomal proteins"	2	9	5.46	6.16e-05
281	2	YMR143W RPS16A SGDID:S000004751_ Chr XIII from 551927-551950_552495-552902_ Verified ORF_ "Protein component of the small (40S) ribosomal subunit; identical to Rps16Bp and has similarity to E. coli S9 and rat S16 ribosomal proteins"	2	9	5.46	6.16e-05
282	1	YDL237W YDL237W SGDID:S000002396_ Chr IV from 30657-31829_ Uncharacterized ORF_ "Putative protein of unknown function; YDL237W is not an essential gene; null mutant displays decreased frequency of mitochondrial genome loss (petite formation) and severe growth defect in minimal glycerol media"	2	16	6.854	4.17e-06
283	1	YGR285C ZUO1 SGDID:S000003517_ Chr VII from 1063160-1061859_ reverse complement_ Verified ORF_ "Cytosolic ribosome-associated chaperone that acts_ together with Ssz1p and the Ssb proteins_ as a chaperone for nascent polypeptide chains; contains a DnaJ domain and functions as a J-protein partner for Ssb1p and Ssb2p"	2	3	7.496	1
284	1	YBR140C IRA1 SGDID:S000000344_ Chr II from 526622-517344_ reverse complement_ Verified ORF_ "GTPase-activating protein that negatively regulates RAS by converting it from the GTP- to the GDP-bound inactive form_ required for reducing cAMP levels under nutrient limiting conditions_ mediates membrane association of adenylate cyclase"	2	2	4.303	1
285	1	YOR142W LSC1 SGDID:S000005668_ Chr XV from 593058-594047_ Verified ORF_ "Alpha subunit of succinyl-CoA ligase_ which is a mitochondrial enzyme of the TCA cycle that catalyzes the nucleotide-dependent conversion of succinyl-CoA to succinate; phosphorylated"	2	3	5.557	0.000361
286	1	YOR096W RPS7A SGDID:S000005622_ Chr XV from 505795-505938_506340-506768_ Verified ORF_ "Protein component of the small (40S) ribosomal subunit_ nearly identical to Rps7Bp; interacts with Kti11p; deletion causes hypersensitivity to zymocin; has similarity to rat S7 and Xenopus S8 ribosomal proteins"	2	7	8.539	5.85e-07
287	1	YLR048W RPS0B SGDID:S000004038_ Chr XII from 242233-242322_242682-243350_ Verified ORF_ "Protein component of the small (40S) ribosomal subunit_ nearly identical to Rps0Ap; required for maturation of 18S rRNA along with Rps0Ap; deletion of either RPS0 gene reduces growth rate_ deletion of both genes is lethal"	2	8	7.392	0.000571
287	2	YGR214W RPS0A SGDID:S000003446_ Chr VII from 920580-920669_921125-921793_ Verified ORF_ "Protein component of the small (40S) ribosomal subunit_ nearly identical to Rps0Bp; required for maturation of 18S rRNA along with Rps0Bp; deletion of either RPS0 gene reduces growth rate_ deletion of both genes is lethal"	2	8	7.392	0.000571
288	1	YMR027W YMR027W SGDID:S000004629_ Chr XIII from 325876-327288_ Uncharacterized ORF_ "Putative protein of unknown function; green fluorescent protein (GFP)-fusion protein localizes to the nucleus and cytoplasm; YMR027W is not an essential gene"	2	2	4.946	0.000347
289	1	YHR018C ARG4 SGDID:S000001060_ Chr VIII from 141395-140004_ reverse complement_ Verified ORF_ "Argininosuccinate lyase_ catalyzes the final step in the arginine biosynthesis pathway"	2	3	6.453	0.000636
290	1	YDR345C HXT3 SGDID:S000002753_ Chr IV from 1164655-1162952_ reverse complement_ Verified ORF_ "Low affinity glucose transporter of the major facilitator superfamily_ expression is induced in low or high glucose conditions"	2	8	6.986	1.95e-06
291	1	YNL220W ADE12 SGDID:S000005164_ Chr XIV from 234414-235715_ Verified ORF_ "Adenylosuccinate synthase_ catalyzes the first step in synthesis of adenosine monophosphate from inosine 5'monophosphate during purine nucleotide biosynthesis; exhibits binding to single-stranded autonomously replicating (ARS) core sequence"	2	5	8.218	0.00062
292	1	YHR049W FSH1 SGDID:S000001091_ Chr VIII from 206455-207186_ Verified ORF_ "Serine hydrolase that localizes to both the nucleus and cytoplasm; sequence is similar to Fsh2p and Fsh3p"	2	8	7.455	2.15e-08
293	1	YOL127W RPL25 SGDID:S000005487_ Chr XV from 80348-80360_80775-81190_ Verified ORF_ "Primary rRNA-binding ribosomal protein component of the large (60S) ribosomal subunit_ has similarity to E. coli L23 and rat L23a ribosomal proteins; binds to 26S rRNA via a conserved C-terminal motif"	2	3	6.895	2.23e-05
294	1	YGR152C RSR1 SGDID:S000003384_ Chr VII from 795497-794679_ reverse complement_ Verified ORF_ "GTP-binding protein of the ras superfamily required for bud site selection_ morphological changes in response to mating pheromone_ and efficient cell fusion; localized to the plasma membrane; significantly similar to mammalian Rap GTPases"	2	3	5.444	8.52e-07
295	1	YGL031C RPL24A SGDID:S000002999_ Chr VII from 437939-437472_ reverse complement_ Verified ORF_ "Ribosomal protein L30 of the large (60S) ribosomal subunit_ nearly identical to Rpl24Bp and has similarity to rat L24 ribosomal protein; not essential for translation but may be required for normal translation rate"	2	3	6.392	0.00083
295	2	YGR148C RPL24B SGDID:S000003380_ Chr VII from 787784-787317_ reverse complement_ Verified ORF_ "Ribosomal protein L30 of the large (60S) ribosomal subunit_ nearly identical to Rpl24Ap and has similarity to rat L24 ribosomal protein; not essential for translation but may be required for normal translation rate"	2	3	6.392	0.00083
296	1	YKL081W TEF4 SGDID:S000001564_ Chr XI from 282535-282739_283066-284099_ Verified ORF_ "Translation elongation factor EF-1 gamma"	2	5	6.746	2.68e-08
297	1	YNL098C RAS2 SGDID:S000005042_ Chr XIV from 440572-439604_ reverse complement_ Verified ORF_ "GTP-binding protein that regulates the nitrogen starvation response_ sporulation_ and filamentous growth; farnesylation and palmitoylation required for activity and localization to plasma membrane; homolog of mammalian Ras proto-oncogenes"	2	4	5.65	1.8e-08
298	1	YDR064W RPS13 SGDID:S000002471_ Chr IV from 579457-579477_580017-580451_ Verified ORF_ "Protein component of the small (40S) ribosomal subunit; has similarity to E. coli S15 and rat S13 ribosomal proteins"	2	9	6.88	6.26e-06
299	1	YKR013W PRY2 SGDID:S000001721_ Chr XI from 463602-464591_ Verified ORF_ "Protein of unknown function_ has similarity to Pry1p and Pry3p and to the plant PR-1 class of pathogen related proteins"	2	19	8.611	3.12e-11
300	1	YBR005W RCR1 SGDID:S000000209_ Chr II from 245908-246549_ Verified ORF_ "Protein of the ER membrane involved in cell wall chitin deposition; may function in the endosomal-vacuolar trafficking pathway_ helping determine whether plasma membrane proteins are degraded or routed to the plasma membrane"	2	3	6.497	3.16e-08
301	1	YER117W RPL23B SGDID:S000000919_ Chr V from 396765-396806_397278-397649_ Verified ORF_ "Protein component of the large (60S) ribosomal subunit_ identical to Rpl23Ap and has similarity to E. coli L14 and rat L23 ribosomal proteins"	2	18	8.093	7.99e-14
301	2	YBL087C RPL23A SGDID:S000000183_ Chr II from 60735-60694_60189-59818_ reverse complement_ Verified ORF_ "Protein component of the large (60S) ribosomal subunit_ identical to Rpl23Bp and has similarity to E. coli L14 and rat L23 ribosomal proteins"	2	18	8.093	7.99e-14
302	1	YER057C HMF1 SGDID:S000000859_ Chr V from 271124-270735_ reverse complement_ Verified ORF_ "Member of the p14.5 protein family with similarity to Mmf1p_ functionally complements Mmf1p function when targeted to mitochondria; heat shock inducible; high-dosage growth inhibitor; forms a homotrimer in vitro"	2	6	7.675	1.22e-06
303	1	YLR307W CDA1 SGDID:S000004298_ Chr XII from 745622-746527_ Verified ORF_ "Chitin deacetylase_ together with Cda2p involved in the biosynthesis ascospore wall component_ chitosan; required for proper rigidity of the ascospore wall"	2	4	7.025	8.59e-08
304	1	YEL026W SNU13 SGDID:S000000752_ Chr V from 101943-102323_ Verified ORF_ "RNA binding protein_ part of U3 snoRNP involved in rRNA processing_ part of U4/U6-U5 tri-snRNP involved in mRNA splicing_ similar to human 15.5K protein"	2	4	8.764	0.000669
305	1	YNL208W YNL208W SGDID:S000005152_ Chr XIV from 254419-255018_ Verified ORF_ "Protein of unknown function; may interact with ribosomes_ based on co-purification experiments; authentic_ non-tagged protein is detected in purified mitochondria in high-throughput studies; potential orthologs found in other fungi"	2	33	9.982	7.81e-10
306	1	YML070W DAK1 SGDID:S000004535_ Chr XIII from 133475-135229_ Verified ORF_ "Dihydroxyacetone kinase_ required for detoxification of dihydroxyacetone (DHA); involved in stress adaptation"	2	5	7.352	2.26e-07
307	1	YJL068C YJL068C SGDID:S000003604_ Chr X from 313910-313011_ reverse complement_ Verified ORF_ "Non-essential intracellular esterase that can function as an S-formylglutathione hydrolase; may be involved in the detoxification of formaldehyde_ which can be metabolized to S-formylglutathione; similar to human esterase D"	2	3	6.014	7.26e-05
308	1	YDR023W SES1 SGDID:S000002430_ Chr IV from 489506-490894_ Verified ORF_ "Cytosolic seryl-tRNA synthetase_ class II aminoacyl-tRNA synthetase that aminoacylates tRNA(Ser)_ displays tRNA-dependent amino acid recognition which enhances discrimination of the serine substrate_ interacts with peroxin Pex21p"	2	4	5.637	4.92e-05
309	1	YDR447C RPS17B SGDID:S000002855_ Chr IV from 1355546-1355544_1355229-1354822_ reverse complement_ Verified ORF_ "Ribosomal protein 51 (rp51) of the small (40s) subunit; nearly identical to Rps17Ap and has similarity to rat S17 ribosomal protein"	2	6	6.171	2.22e-07
309	2	YML024W RPS17A SGDID:S000004486_ Chr XIII from 225889-225891_226290-226697_ Verified ORF_ "Ribosomal protein 51 (rp51) of the small (40s) subunit; nearly identical to Rps17Bp and has similarity to rat S17 ribosomal protein"	2	6	6.171	2.22e-07
310	1	YBR218C PYC2 SGDID:S000000422_ Chr II from 662244-658702_ reverse complement_ Verified ORF_ "Pyruvate carboxylase isoform_ cytoplasmic enzyme that converts pyruvate to oxaloacetate; highly similar to isoform Pyc1p but differentially regulated; mutations in the human homolog are associated with lactic acidosis"	2	3	5.953	0.000196
310	2	YGL062W PYC1 SGDID:S000003030_ Chr VII from 385199-388735_ Verified ORF_ "Pyruvate carboxylase isoform_ cytoplasmic enzyme that converts pyruvate to oxaloacetate; highly similar to isoform Pyc2p but differentially regulated; mutations in the human homolog are associated with lactic acidosis"	2	3	5.953	0.000196
311	1	YIL078W THS1 SGDID:S000001340_ Chr IX from 212496-214700_ Verified ORF_ "Threonyl-tRNA synthetase_ essential cytoplasmic protein"	2	2	4.877	0.000349
312	1	YKR043C YKR043C SGDID:S000001751_ Chr XI from 521354-520539_ reverse complement_ Uncharacterized ORF_ "Putative protein of unknown function; green fluorescent protein (GFP)-fusion protein localizes to the cytoplasm and nucleus"	2	4	7.092	1.87e-06
313	1	YGR019W UGA1 SGDID:S000003251_ Chr VII from 525233-526648_ Verified ORF_ "Gamma-aminobutyrate (GABA) transaminase (4-aminobutyrate aminotransferase) involved in the 4-aminobutyrate and glutamate degradation pathways; required for normal oxidative stress tolerance and nitrogen utilization"	2	4	5.088	0.000943
314	1	YKL006W RPL14A SGDID:S000001489_ Chr XI from 431549-431677_432076-432363_ Verified ORF_ "N-terminally acetylated protein component of the large (60S) ribosomal subunit_ nearly identical to Rpl14Bp and has similarity to rat L14 ribosomal protein; rpl14a csh5 double null mutant exhibits synthetic slow growth"	2	10	7.724	5.12e-08
314	2	YHL001W RPL14B SGDID:S000000993_ Chr VIII from 104272-104400_104799-105086_ Verified ORF_ "Protein component of the large (60S) ribosomal subunit_ nearly identical to Rpl14Ap and has similarity to rat L14 ribosomal protein"	2	10	7.724	5.12e-08
315	1	YGR086C PIL1 SGDID:S000003318_ Chr VII from 650621-649602_ reverse complement_ Verified ORF_ "Primary component of eisosomes_ which are large immobile cell cortex structures associated with endocytosis; null mutants show activation of Pkc1p/Ypk1p stress resistance pathways; detected in phosphorylated state in mitochondria"	2	4	5.911	6.8e-05
316	1	YOR104W PIN2 SGDID:S000005630_ Chr XV from 517643-518491_ Verified ORF_ "Protein that induces appearance of [PIN+] prion when overproduced"	2	4	6.586	6.07e-08
317	1	YKL150W MCR1 SGDID:S000001633_ Chr XI from 166549-167457_ Verified ORF_ "Mitochondrial NADH-cytochrome b5 reductase_ involved in ergosterol biosynthesis"	2	2	7.057	0.000137
318	1	YOR275C RIM20 SGDID:S000005801_ Chr XV from 841068-839083_ reverse complement_ Verified ORF_ "Protein involved in proteolytic activation of Rim101p in response to alkaline pH; PalA/AIP1/Alix family member; interaction with the ESCRT-III subunit Snf7p suggests a relationship between pH response and multivesicular body formation"	2	2	4.673	0.000575
319	1	YMR090W YMR090W SGDID:S000004696_ Chr XIII from 449244-449927_ Uncharacterized ORF_ "Putative protein of unknown function with similarity to DTDP-glucose 4_6-dehydratases; green fluorescent protein (GFP)-fusion protein localizes to the cytoplasm; YMR090W is not an essential gene"	2	2	7.367	2.36e-05
320	1	YLR106C MDN1 SGDID:S000004096_ Chr XII from 363739-349007_ reverse complement_ Verified ORF_ "Huge dynein-related AAA-type ATPase (midasin)_ forms extended pre-60S particle with the Rix1 complex (Rix1p-Ipi1p-Ipi3p)_ may mediate ATP-dependent remodeling of 60S subunits and subsequent export from nucleoplasm to cytoplasm"	2	5	4.038	1
321	1	YER036C ARB1 SGDID:S000000838_ Chr V from 225198-223366_ reverse complement_ Verified ORF_ "ATPase of the ATP-binding cassette (ABC) family involved in 40S and 60S ribosome biogenesis_ has similarity to Gcn20p; shuttles from nucleus to cytoplasm_ physically interacts with Tif6p_ Lsg1p"	2	3	6.015	7.81e-07
322	1	YBR053C YBR053C SGDID:S000000257_ Chr II from 340749-339673_ reverse complement_ Uncharacterized ORF_ "Putative protein of unknown function; induced by cell wall perturbation"	2	7	6.014	7.87e-07
323	1	YJR083C ACF4 SGDID:S000003843_ Chr X from 583530-582601_ reverse complement_ Verified ORF_ "Protein of unknown function_ computational analysis of large-scale protein-protein interaction data suggests a possible role in actin cytoskeleton organization; potential Cdc28p substrate"	2	2	5.377	0.000233
324	1	YOR347C PYK2 SGDID:S000005874_ Chr XV from 986459-984939_ reverse complement_ Verified ORF_ "Pyruvate kinase that appears to be modulated by phosphorylation; PYK2 transcription is repressed by glucose_ and Pyk2p may be active under low glycolytic flux"	2	20	6.975	0.00028
325	1	YGL147C RPL9A SGDID:S000003115_ Chr VII from 228334-227759_ reverse complement_ Verified ORF_ "Protein component of the large (60S) ribosomal subunit_ nearly identical to Rpl9Bp and has similarity to E. coli L6 and rat L9 ribosomal proteins"	2	6	6.694	0.000853
325	2	YNL067W RPL9B SGDID:S000005011_ Chr XIV from 499682-500257_ Verified ORF_ "Protein component of the large (60S) ribosomal subunit_ nearly identical to Rpl9Ap and has similarity to E. coli L6 and rat L9 ribosomal proteins"	2	6	6.694	0.000853
326	1	YHR087W YHR087W SGDID:S000001129_ Chr VIII from 280822-281157_ Verified ORF_ "Protein of unknown function involved in RNA metabolism; has structural similarity to SBDS_ the human protein mutated in Shwachman-Diamond Syndrome (the yeast SBDS ortholog = SDO1); null mutation suppresses cdc13-1 temperature sensitivity"	2	4	6.063	6.02e-05
327	1	YEL042W GDA1 SGDID:S000000768_ Chr V from 73771-75327_ Verified ORF_ "Guanosine diphosphatase located in the Golgi_ involved in the transport of GDP-mannose into the Golgi lumen by converting GDP to GMP after mannose is transferred its substrate"	2	6	7.451	2.52e-05
328	1	YBR025C OLA1 SGDID:S000000229_ Chr II from 291865-290681_ reverse complement_ Verified ORF_ "P-loop ATPase with similarity to human OLA1 and bacterial YchF; identified as specifically interacting with the proteasome; protein levels are induced by hydrogen peroxide"	2	2	5.731	0.000375
329	1	YKL190W CNB1 SGDID:S000001673_ Chr XI from 82952-83003_83080-83555_ Verified ORF_ "Calcineurin B; the regulatory subunit of calcineurin_ a Ca++/calmodulin-regulated type 2B protein phosphatase which regulates Crz1p (a stress-response transcription factor)_ the other calcineurin subunit is encoded by CNA1 and/or CMP1"	2	11	8.275	0.000532
330	1	YBL030C PET9 SGDID:S000000126_ Chr II from 164000-163044_ reverse complement_ Verified ORF_ "Major ADP/ATP carrier of the mitochondrial inner membrane_ exchanges cytosolic ADP for mitochondrially synthesized ATP; phosphorylated; required for viability in many common lab strains carrying a mutation in the polymorphic SAL1 gene"	2	2	5.078	0.00024
331	1	YOR317W FAA1 SGDID:S000005844_ Chr XV from 909340-911442_ Verified ORF_ "Long chain fatty acyl-CoA synthetase with a preference for C12:0-C16:0 fatty acids; involved in the activation of imported fatty acids; localized to both lipid particles and mitochondrial outer membrane; essential for stationary phase"	2	5	5.134	5.25e-06
332	1	YDL086W YDL086W SGDID:S000002244_ Chr IV from 301413-302234_ Uncharacterized ORF_ "Putative protein of unknown function; the authentic_ non-tagged protein is detected in highly purified mitochondria in high-throughput studies; YDL086W is not an essential gene"	2	3	6.066	0.000101
333	1	YGR208W SER2 SGDID:S000003440_ Chr VII from 911888-912817_ Verified ORF_ "Phosphoserine phosphatase of the phosphoglycerate pathway_ involved in serine and glycine biosynthesis_ expression is regulated by the available nitrogen source"	2	9	6.256	4.71e-05
334	1	YFL037W TUB2 SGDID:S000001857_ Chr VI from 56335-57708_ Verified ORF_ "Beta-tubulin; associates with alpha-tubulin (Tub1p and Tub3p) to form tubulin dimer_ which polymerizes to form microtubules"	2	2	5.169	0.000471
335	1	YGL151W NUT1 SGDID:S000003119_ Chr VII from 217529-220927_ Verified ORF_ "Component of the RNA polymerase II mediator complex_ which is required for transcriptional activation and also has a role in basal transcription"	2	3	4.813	0.000876
336	1	YBR145W ADH5 SGDID:S000000349_ Chr II from 533756-534811_ Verified ORF_ "Alcohol dehydrogenase isoenzyme V; involved in ethanol production"	2	17	6.418	6.34e-07
337	1	YOL040C RPS15 SGDID:S000005400_ Chr XV from 253576-253148_ reverse complement_ Verified ORF_ "Protein component of the small (40S) ribosomal subunit; has similarity to E. coli S19 and rat S15 ribosomal proteins"	2	2	4.865	1
338	1	YPL004C LSP1 SGDID:S000005925_ Chr XVI from 551654-550629_ reverse complement_ Verified ORF_ "Primary component of eisosomes_ which are large immobile patch structures at the cell cortex associated with endocytosis_ along with Pil1p and Sur7p; null mutants show activation of Pkc1p/Ypk1p stress resistance pathways"	2	2	4.693	1
339	1	YGL039W YGL039W SGDID:S000003007_ Chr VII from 423967-425013_ Verified ORF_ "Oxidoreductase_ catalyzes NADPH-dependent reduction of the bicyclic diketone bicyclo[2.2.2]octane-2_6-dione (BCO2_6D) to the chiral ketoalcohol (1R_4S_6S)-6-hydroxybicyclo[2.2.2]octane-2-one (BCO2one6ol)"	2	2	6	3.29e-06
340	1	YKR058W GLG1 SGDID:S000001766_ Chr XI from 552412-554262_ Verified ORF_ "Self-glucosylating initiator of glycogen synthesis_ also glucosylates n-dodecyl-beta-D-maltoside; similar to mammalian glycogenin"	2	2	5.62	4.62e-09
341	1	YDR487C RIB3 SGDID:S000002895_ Chr IV from 1428973-1428347_ reverse complement_ Verified ORF_ "3_4-dihydroxy-2-butanone-4-phosphate synthase (DHBP synthase)_ required for riboflavin biosynthesis from ribulose-5-phosphate_ also has an unrelated function in mitochondrial respiration"	2	2	5.14	0.000882
342	1	YLR029C RPL15A SGDID:S000004019_ Chr XII from 202591-201977_ reverse complement_ Verified ORF_ "Protein component of the large (60S) ribosomal subunit_ nearly identical to Rpl15Bp and has similarity to rat L15 ribosomal protein; binds to 5.8 S rRNA"	2	14	6.974	1.34e-05
342	2	YMR121C RPL15B SGDID:S000004728_ Chr XIII from 510347-509733_ reverse complement_ Verified ORF_ "Protein component of the large (60S) ribosomal subunit_ nearly identical to Rpl15Ap and has similarity to rat L15 ribosomal protein; binds to 5.8 S rRNA"	2	14	6.974	1.34e-05
343	1	YPL212C PUS1 SGDID:S000006133_ Chr XVI from 153148-151514_ reverse complement_ Verified ORF_ "tRNA:pseudouridine synthase_ introduces pseudouridines at positions 26-28_ 34-36_ 65_ and 67 of tRNA; nuclear protein that appears to be involved in tRNA export; also acts on U2 snRNA"	2	2	5.208	0.000525
344	1	YMR092C AIP1 SGDID:S000004698_ Chr XIII from 453478-451631_ reverse complement_ Verified ORF_ "Actin cortical patch component_ interacts with the actin depolymerizing factor cofilin; required to restrict cofilin localization to cortical patches; contains WD repeats"	2	3	6.25	1
345	1	YBL002W HTB2 SGDID:S000000098_ Chr II from 236495-236890_ Verified ORF_ "One of two nearly identical (see HTB1) histone H2B subtypes required for chromatin assembly and chromosome function; Rad6p-Bre1p-Lge1p mediated ubiquitination regulates transcriptional activation_ meiotic DSB formation and H3 methylation"	2	5	7.73	4.71e-06
345	2	YDR224C HTB1 SGDID:S000002632_ Chr IV from 914709-914314_ reverse complement_ Verified ORF_ "One of two nearly identical (see HTB2) histone H2B subtypes required for chromatin assembly and chromosome function; Rad6p-Bre1p-Lge1p mediated ubiquitination regulates transcriptional activation_ meiotic DSB formation and H3 methylation"	2	5	7.73	4.71e-06
346	1	YDL100C GET3 SGDID:S000002258_ Chr IV from 283176-282112_ reverse complement_ Verified ORF_ "Guanine nucleotide exchange factor for Gpa1p; amplifies G protein signaling; subunit of the GET complex_ which is involved in Golgi to ER trafficking; has low-level ATPase activity and is involved in resistance to heat and metal stress"	2	3	5.702	1.33e-05
347	1	YCL050C APA1 SGDID:S000000555_ Chr III from 38801-37836_ reverse complement_ Verified ORF_ "Diadenosine 5'_5''-P1_P4-tetraphosphate phosphorylase I (AP4A phosphorylase)_ involved in catabolism of bis(5'-nucleosidyl) tetraphosphates; has similarity to Apa2p"	2	2	5.722	0.000842
348	1	YKL067W YNK1 SGDID:S000001550_ Chr XI from 314456-314917_ Verified ORF_ "Nucleoside diphosphate kinase_ catalyzes the transfer of gamma phosphates from nucleoside triphosphates_ usually ATP_ to nucleoside diphosphates by a mechanism that involves formation of an autophosphorylated enzyme intermediate"	2	12	7.005	1.98e-05
349	1	YGL137W SEC27 SGDID:S000003105_ Chr VII from 249874-249891_250092-252743_ Verified ORF_ "Essential beta'-coat protein of the COPI coatomer_ involved in ER-to-Golgi and Golgi-to-ER transport; contains WD40 domains that mediate cargo selective interactions; 45% sequence identity to mammalian beta'-COP"	2	2	6.551	0.000102
350	1	YMR205C PFK2 SGDID:S000004818_ Chr XIII from 674765-671886_ reverse complement_ Verified ORF_ "Beta subunit of heterooctameric phosphofructokinase involved in glycolysis_ indispensable for anaerobic growth_ activated by fructose-2_6-bisphosphate and AMP_ mutation inhibits glucose induction of cell cycle-related genes"	2	4	5.58	9.58e-05
351	1	YCR004C YCP4 SGDID:S000000597_ Chr III from 120316-119573_ reverse complement_ Verified ORF_ "Protein of unknown function_ has sequence and structural similarity to flavodoxins; the authentic_ non-tagged protein is detected in highly purified mitochondria in high-throughput studies"	2	3	6.865	7.16e-07
352	1	YBR143C SUP45 SGDID:S000000347_ Chr II from 532176-530863_ reverse complement_ Verified ORF_ "Polypeptide release factor involved in translation termination; mutant form acts as a recessive omnipotent suppressor"	2	2	6.168	3.26e-05
353	1	YJL167W ERG20 SGDID:S000003703_ Chr X from 105008-106066_ Verified ORF_ "Farnesyl pyrophosphate synthetase_ has both dimethylallyltranstransferase and geranyltranstransferase activities; catalyzes the formation of C15 farnesyl pyrophosphate units for isoprenoid and sterol biosynthesis"	2	9	7.504	1.41e-05
354	1	YHR064C SSZ1 SGDID:S000001106_ Chr VIII from 227143-225527_ reverse complement_ Verified ORF_ "Hsp70 protein that interacts with Zuo1p (a DnaJ homolog) to form a ribosome-associated complex that binds the ribosome via the Zuo1p subunit; also involved in pleiotropic drug resistance via sequential activation of PDR1 and PDR5; binds ATP"	2	3	6.008	0.000448
355	1	YDL218W YDL218W SGDID:S000002377_ Chr IV from 66494-67447_ Uncharacterized ORF_ "Putative protein of unknown function; YDL218W transcription is regulated by Azf1p and induced by starvation and aerobic conditions"	2	3	7.539	2.44e-11
356	1	YPR041W TIF5 SGDID:S000006245_ Chr XVI from 648701-649918_ Verified ORF_ "Translation initiation factor eIF-5; N-terminal domain functions as a GTPase-activating protein to mediate hydrolysis of ribosome-bound GTP; C-terminal domain is the core of ribosomal preinitiation complex formation"	2	3	4.592	1
357	1	YDR341C YDR341C SGDID:S000002749_ Chr IV from 1153621-1151798_ reverse complement_ Verified ORF_ "Arginyl-tRNA synthetase_ proposed to be cytoplasmic but the authentic_ non-tagged protein is detected in highly purified mitochondria in high-throughput studies"	2	2	5.014	0.000977
358	1	YML078W CPR3 SGDID:S000004543_ Chr XIII from 111002-111550_ Verified ORF_ "Mitochondrial peptidyl-prolyl cis-trans isomerase (cyclophilin)_ catalyzes the cis-trans isomerization of peptide bonds N-terminal to proline residues; involved in protein refolding after import into mitochondria"	2	11	5.039	2.23e-05
359	1	YFL027C GYP8 SGDID:S000001867_ Chr VI from 81910-80417_ reverse complement_ Verified ORF_ "GTPase-activating protein for yeast Rab family members; Ypt1p is the preferred in vitro substrate but also acts on Sec4p_ Ypt31p and Ypt32p; involved in the regulation of ER to Golgi vesicle transport"	2	4	4.896	0.000944
360	1	YPL198W RPL7B SGDID:S000006119_ Chr XVI from 173151-173161_173571-173664_174072-174701_ Verified ORF_ "Protein component of the large (60S) ribosomal subunit_ nearly identical to Rpl7Ap and has similarity to E. coli L30 and rat L7 ribosomal proteins; contains a conserved C-terminal Nucleic acid Binding Domain (NDB2)"	1	7	4.024	3.2e-08
360	2	YGL076C RPL7A SGDID:S000003044_ Chr VII from 365999-365989_365529-365436_364967-364338_ reverse complement_ Verified ORF_ "Protein component of the large (60S) ribosomal subunit_ nearly identical to Rpl7Bp and has similarity to E. coli L30 and rat L7 ribosomal proteins; contains a conserved C-terminal Nucleic acid Binding Domain (NDB2)"	1	7	4.024	3.2e-08
361	1	YDL130W RPP1B SGDID:S000002288_ Chr IV from 229906-230019_230321-230527_ Verified ORF_ "Ribosomal protein P1 beta_ component of the ribosomal stalk_ which is involved in interaction of translational elongation factors with ribosome; accumulation is regulated by phosphorylation and interaction with the P2 stalk component"	1	5	3.974	1.33e-09
362	1	YJR075W HOC1 SGDID:S000003836_ Chr X from 573974-575164_ Verified ORF_ "Alpha-1_6-mannosyltransferase involved in cell wall mannan biosynthesis; subunit of a Golgi-localized complex that also contains Anp1p_ Mnn9p_ Mnn11p_ and Mnn10p; identified as a suppressor of a cell lysis sensitive pkc1-371 allele"	1	3	5.067	5.95e-09
363	1	YKL024C URA6 SGDID:S000001507_ Chr XI from 392783-392169_ reverse complement_ Verified ORF_ "Uridylate kinase_ catalyzes the seventh enzymatic step in the de novo biosynthesis of pyrimidines_ converting uridine monophosphate (UMP) into uridine-5'-diphosphate (UDP)"	1	2	4.097	1.77e-09
364	1	YBR009C HHF1 SGDID:S000000213_ Chr II from 255682-255371_ reverse complement_ Verified ORF_ "One of two identical histone H4 proteins (see also HHF2); core histone required for chromatin assembly and chromosome function; contributes to telomeric silencing; N-terminal domain involved in maintaining genomic integrity"	1	9	3.538	1.07e-06
364	2	YNL030W HHF2 SGDID:S000004975_ Chr XIV from 576728-577039_ Verified ORF_ "One of two identical histone H4 proteins (see also HHF1); core histone required for chromatin assembly and chromosome function; contributes to telomeric silencing; N-terminal domain involved in maintaining genomic integrity"	1	9	3.538	1.07e-06
365	1	YDL134C PPH21 SGDID:S000002292_ Chr IV from 220771-219662_ reverse complement_ Verified ORF_ "Catalytic subunit of protein phosphatase 2A_ functionally redundant with Pph22p; methylated at C terminus; forms alternate complexes with several regulatory subunits; involved in signal transduction and regulation of mitosis"	1	1	3.718	0.000371
366	1	YNR002C ATO2 SGDID:S000005285_ Chr XIV from 633858-633010_ reverse complement_ Verified ORF_ "Putative transmembrane protein involved in export of ammonia_ a starvation signal that promotes cell death in aging colonies; phosphorylated in mitochondria; member of the TC 9.B.33 YaaH family; homolog of Ady2p and Y. lipolytica Gpr1p"	1	1	3.591	5.69e-07
367	1	YJL116C NCA3 SGDID:S000003652_ Chr X from 194872-193859_ reverse complement_ Verified ORF_ "Protein that functions with Nca2p to regulate mitochondrial expression of subunits 6 (Atp6p) and 8 (Atp8p ) of the Fo-F1 ATP synthase; member of the SUN family"	1	2	3.787	1.98e-06
368	1	YGR014W MSB2 SGDID:S000003246_ Chr VII from 516947-520867_ Verified ORF_ "Mucin family member involved in the Cdc42p- and MAP kinase-dependent filamentous growth signaling pathway; also functions as an osmosensor in parallel to the Sho1p-mediated pathway; potential Cdc28p substrate"	1	2	4.005	2.06e-05
369	1	YGL167C PMR1 SGDID:S000003135_ Chr VII from 190474-187622_ reverse complement_ Verified ORF_ "High affinity Ca2+/Mn2+ P-type ATPase required for Ca2+ and Mn2+ transport into Golgi; involved in Ca2+ dependent protein sorting and processing; mutations in human homolog ATP2C1 cause acantholytic skin condition Hailey-Hailey disease"	1	7	3.719	0.00096
370	1	YMR183C SSO2 SGDID:S000004795_ Chr XIII from 627807-626920_ reverse complement_ Verified ORF_ "Plasma membrane t-SNARE involved in fusion of secretory vesicles at the plasma membrane; syntaxin homolog that is functionally redundant with Sso1p"	1	1	4.256	8.2e-05
371	1	YML131W YML131W SGDID:S000004600_ Chr XIII from 10199-11296_ Uncharacterized ORF_ "Putative protein of unknown function with similarity to oxidoreductases; HOG1 and SKO1-dependent mRNA expression is induced after osmotic shock; GFP-fusion protein localizes to the cytoplasm and is induced by the DNA-damaging agent MMS"	1	4	3.869	1.29e-11
372	1	YPL221W FLC1 SGDID:S000006142_ Chr XVI from 133042-135423_ Verified ORF_ "Putative FAD transporter; required for uptake of FAD into endoplasmic reticulum; involved in cell wall maintenance"	1	2	3.961	1.45e-07
373	1	YLR359W ADE13 SGDID:S000004351_ Chr XII from 844281-845729_ Verified ORF_ "Adenylosuccinate lyase_ catalyzes two steps in the 'de novo' purine nucleotide biosynthetic pathway; expression is repressed by adenine and activated by Bas1p and Pho2p; mutations in human ortholog ADSL cause adenylosuccinase deficiency"	1	1	4.101	4.6e-05
374	1	YMR058W FET3 SGDID:S000004662_ Chr XIII from 388821-390731_ Verified ORF_ "Ferro-O2-oxidoreductase required for high-affinity iron uptake and involved in mediating resistance to copper ion toxicity_ belongs to class of integral membrane multicopper oxidases"	1	2	3.598	4.09e-06
375	1	YBL072C RPS8A SGDID:S000000168_ Chr II from 89123-88521_ reverse complement_ Verified ORF_ "Protein component of the small (40S) ribosomal subunit; identical to Rps8Bp and has similarity to rat S8 ribosomal protein"	1	2	3.868	1.28e-09
375	2	YER102W RPS8B SGDID:S000000904_ Chr V from 363096-363698_ Verified ORF_ "Protein component of the small (40S) ribosomal subunit; identical to Rps8Ap and has similarity to rat S8 ribosomal protein"	1	2	3.868	1.28e-09
376	1	YBR093C PHO5 SGDID:S000000297_ Chr II from 430945-429542_ reverse complement_ Verified ORF_ "Repressible acid phosphatase (1 of 3) that also mediates extracellular nucleotide-derived phosphate hydrolysis; secretory pathway derived cell surface glycoprotein; induced by phosphate starvation and coordinately regulated by PHO4 and PHO2"	1	9	4.887	4.66e-14
377	1	YDL182W LYS20 SGDID:S000002341_ Chr IV from 133438-134724_ Verified ORF_ "Homocitrate synthase isozyme_ catalyzes the condensation of acetyl-CoA and alpha-ketoglutarate to form homocitrate_ which is the first step in the lysine biosynthesis pathway; highly similar to the other isozyme_ Lys21p"	1	1	3.774	0.000208
377	2	YDL131W LYS21 SGDID:S000002289_ Chr IV from 227393-228715_ Verified ORF_ "Homocitrate synthase isozyme_ catalyzes the condensation of acetyl-CoA and alpha-ketoglutarate to form homocitrate_ which is the first step in the lysine biosynthesis pathway; highly similar to the other isozyme_ Lys20p"	1	1	3.774	0.000208
378	1	YJL190C RPS22A SGDID:S000003726_ Chr X from 75301-74909_ reverse complement_ Verified ORF_ "Protein component of the small (40S) ribosomal subunit; nearly identical to Rps22Bp and has similarity to E. coli S8 and rat S15a ribosomal proteins"	1	5	4.414	2.4e-07
378	2	YLR367W RPS22B SGDID:S000004359_ Chr XII from 856441-856573_857057-857316_ Verified ORF_ "Protein component of the small (40S) ribosomal subunit; nearly identical to Rps22Ap and has similarity to E. coli S8 and rat S15a ribosomal proteins"	1	5	4.414	2.4e-07
379	1	YKR057W RPS21A SGDID:S000001765_ Chr XI from 551299-551322_551645-551884_ Verified ORF_ "Protein component of the small (40S) ribosomal subunit; nearly identical to Rps21Bp and has similarity to rat S21 ribosomal protein"	1	2	3.855	0.000732
379	2	YJL136C RPS21B SGDID:S000003672_ Chr X from 157270-157247_156786-156547_ reverse complement_ Verified ORF_ "Protein component of the small (40S) ribosomal subunit; nearly identical to Rps21Ap and has similarity to rat S21 ribosomal protein"	1	2	3.855	0.000732
380	1	YAL003W EFB1 SGDID:S000000003_ Chr I from 142176-142255_142622-143162_ Verified ORF_ "Translation elongation factor 1 beta; stimulates nucleotide exchange to regenerate EF-1 alpha-GTP for the next elongation cycle; part of the EF-1 complex_ which facilitates binding of aminoacyl-tRNA to the ribosomal A site"	1	3	3.691	2.6e-07
381	1	YKL035W UGP1 SGDID:S000001518_ Chr XI from 369534-371033_ Verified ORF_ "UDP-glucose pyrophosphorylase (UGPase)_ catalyses the reversible formation of UDP-Glc from glucose 1-phosphate and UTP_ involved in a wide variety of metabolic pathways_ expression modulated by Pho85p through Pho4p"	1	1	4.058	2.81e-06
382	1	YGL156W AMS1 SGDID:S000003124_ Chr VII from 210421-213672_ Verified ORF_ "Vacuolar alpha mannosidase_ involved in free oligosaccharide (fOS) degradation; delivered to the vacuole in a novel pathway separate from the secretory pathway"	1	2	3.952	7.18e-07
383	1	YCR021C HSP30 SGDID:S000000615_ Chr III from 157103-156105_ reverse complement_ Verified ORF_ "Hydrophobic plasma membrane localized_ stress-responsive protein that negatively regulates the H(+)-ATPase Pma1p; induced by heat shock_ ethanol treatment_ weak organic acid_ glucose limitation_ and entry into stationary phase"	1	2	5.065	1.63e-08
384	1	YOR369C RPS12 SGDID:S000005896_ Chr XV from 1028623-1028192_ reverse complement_ Verified ORF_ "Protein component of the small (40S) ribosomal subunit; has similarity to rat ribosomal protein S12"	1	1	4.068	1.67e-07
385	1	YLR172C DPH5 SGDID:S000004162_ Chr XII from 502164-501262_ reverse complement_ Verified ORF_ "Methyltransferase required for synthesis of diphthamide_ which is a modified histidine residue of translation elongation factor 2 (Eft1p or Eft2p); not essential for viability; GFP-Dph5p fusion protein localizes to the cytoplasm"	1	1	3.929	6.32e-06
386	1	YIL123W SIM1 SGDID:S000001385_ Chr IX from 128151-129578_ Verified ORF_ "Protein of the SUN family (Sim1p_ Uth1p_ Nca3p_ Sun4p) that may participate in DNA replication_ promoter contains SCB regulation box at -300 bp indicating that expression may be cell cycle-regulated"	1	5	4.623	1.28e-09
387	1	YDL081C RPP1A SGDID:S000002239_ Chr IV from 310122-309802_ reverse complement_ Verified ORF_ "Ribosomal stalk protein P1 alpha_ involved in the interaction between translational elongation factors and the ribosome; accumulation of P1 in the cytoplasm is regulated by phosphorylation and interaction with the P2 stalk component"	1	2	5.394	1.75e-08
388	1	YPL145C KES1 SGDID:S000006066_ Chr XVI from 279698-278394_ reverse complement_ Verified ORF_ "Member of the oxysterol binding protein family_ which includes seven yeast homologs; involved in negative regulation of Sec14p-dependent Golgi complex secretory functions_ peripheral membrane protein that localizes to the Golgi complex"	1	1	3.524	1.46e-08
389	1	YIL018W RPL2B SGDID:S000001280_ Chr IX from 316766-316769_317170-317930_ Verified ORF_ "Protein component of the large (60S) ribosomal subunit_ identical to Rpl2Ap and has similarity to E. coli L2 and rat L8 ribosomal proteins; expression is upregulated at low temperatures"	1	3	3.529	0.000464
390	1	YKL180W RPL17A SGDID:S000001663_ Chr XI from 109274-109582_109889-110134_ Verified ORF_ "Protein component of the large (60S) ribosomal subunit_ nearly identical to Rpl17Bp and has similarity to E. coli L22 and rat L17 ribosomal proteins; copurifies with the Dam1 complex (aka DASH complex)"	1	3	4.727	1.01e-08
390	2	YJL177W RPL17B SGDID:S000003713_ Chr X from 90784-91092_91410-91655_ Verified ORF_ "Protein component of the large (60S) ribosomal subunit_ nearly identical to Rpl17Ap and has similarity to E. coli L22 and rat L17 ribosomal proteins"	1	3	4.727	1.01e-08
391	1	YHR104W GRE3 SGDID:S000001146_ Chr VIII from 323412-324395_ Verified ORF_ "Aldose reductase involved in methylglyoxal_ d-xylose and arabinose metabolism; stress induced (osmotic_ ionic_ oxidative_ heat shock_ starvation and heavy metals); regulated by the HOG pathway"	1	4	4	1.8e-10
392	1	YFR025C HIS2 SGDID:S000001921_ Chr VI from 204738-203731_ reverse complement_ Verified ORF_ "Histidinolphosphatase_ catalyzes the eighth step in histidine biosynthesis; mutations cause histidine auxotrophy and sensitivity to Cu_ Co_ and Ni salts; transcription is regulated by general amino acid control"	1	2	4.065	1.1e-07
393	1	YDR033W MRH1 SGDID:S000002440_ Chr IV from 508145-509107_ Verified ORF_ "Protein that localizes primarily to the plasma membrane_ also found at the nuclear envelope; the authentic_ non-tagged protein is detected in mitochondria in a phosphorylated state; has similarity to Hsp30p and Yro2p"	1	1	3.52	1
394	1	YBL092W RPL32 SGDID:S000000188_ Chr II from 45975-46367_ Verified ORF_ "Protein component of the large (60S) ribosomal subunit_ has similarity to rat L32 ribosomal protein; overexpression disrupts telomeric silencing"	1	3	3.757	4.52e-06
395	1	YPL273W SAM4 SGDID:S000006194_ Chr XVI from 25087-26064_ Verified ORF_ "S-adenosylmethionine-homocysteine methyltransferase_ functions along with Mht1p in the conversion of S-adenosylmethionine (AdoMet) to methionine to control the methionine/AdoMet ratio"	1	3	3.836	1.38e-05
396	1	YOR224C RPB8 SGDID:S000005750_ Chr XV from 761266-760826_ reverse complement_ Verified ORF_ "RNA polymerase subunit ABC14.5_ common to RNA polymerases I_ II_ and III"	1	1	3.541	4.09e-05
397	1	YBR111C YSA1 SGDID:S000000315_ Chr II from 461867-461172_ reverse complement_ Verified ORF_ "Nudix hydrolase family member with ADP-ribose pyrophosphatase activity"	1	1	3.671	0.000819
398	1	YHR200W RPN10 SGDID:S000001243_ Chr VIII from 499079-499885_ Verified ORF_ "Non-ATPase base subunit of the 19S regulatory particle (RP) of the 26S proteasome; N-terminus plays a role in maintaining the structural integrity of the RP; binds selectively to polyubiquitin chains; homolog of the mammalian S5a protein"	1	1	3.728	1.42e-08
399	1	YPL235W RVB2 SGDID:S000006156_ Chr XVI from 103232-104647_ Verified ORF_ "Essential protein involved in transcription regulation; component of chromatin remodeling complexes; required for assembly and function of the INO80 complex; member of the RUVB-like protein family"	1	92	3.977	2.34e-05
400	1	YPL143W RPL33A SGDID:S000006064_ Chr XVI from 282121-282139_282665-282969_ Verified ORF_ "N-terminally acetylated ribosomal protein L37 of the large (60S) ribosomal subunit_ nearly identical to Rpl33Bp and has similarity to rat L35a; rpl33a null mutant exhibits slow growth while rpl33a rpl33b double null mutant is inviable"	1	2	3.52	8.88e-07
